# Supplementary material for: Modulation of Klebsiella pneumoniae Outer Membrane Vesicle Protein Cargo under Antibiotic Treatment
Source: MDPI journal article supplement (doi:10.3390/biomedicines11061515), 2023-05-24

**Figure S1.** Heatmaps of centered intensity of all perturbed proteins in KpHCD1-OMVs after treatments with different antibiotics.

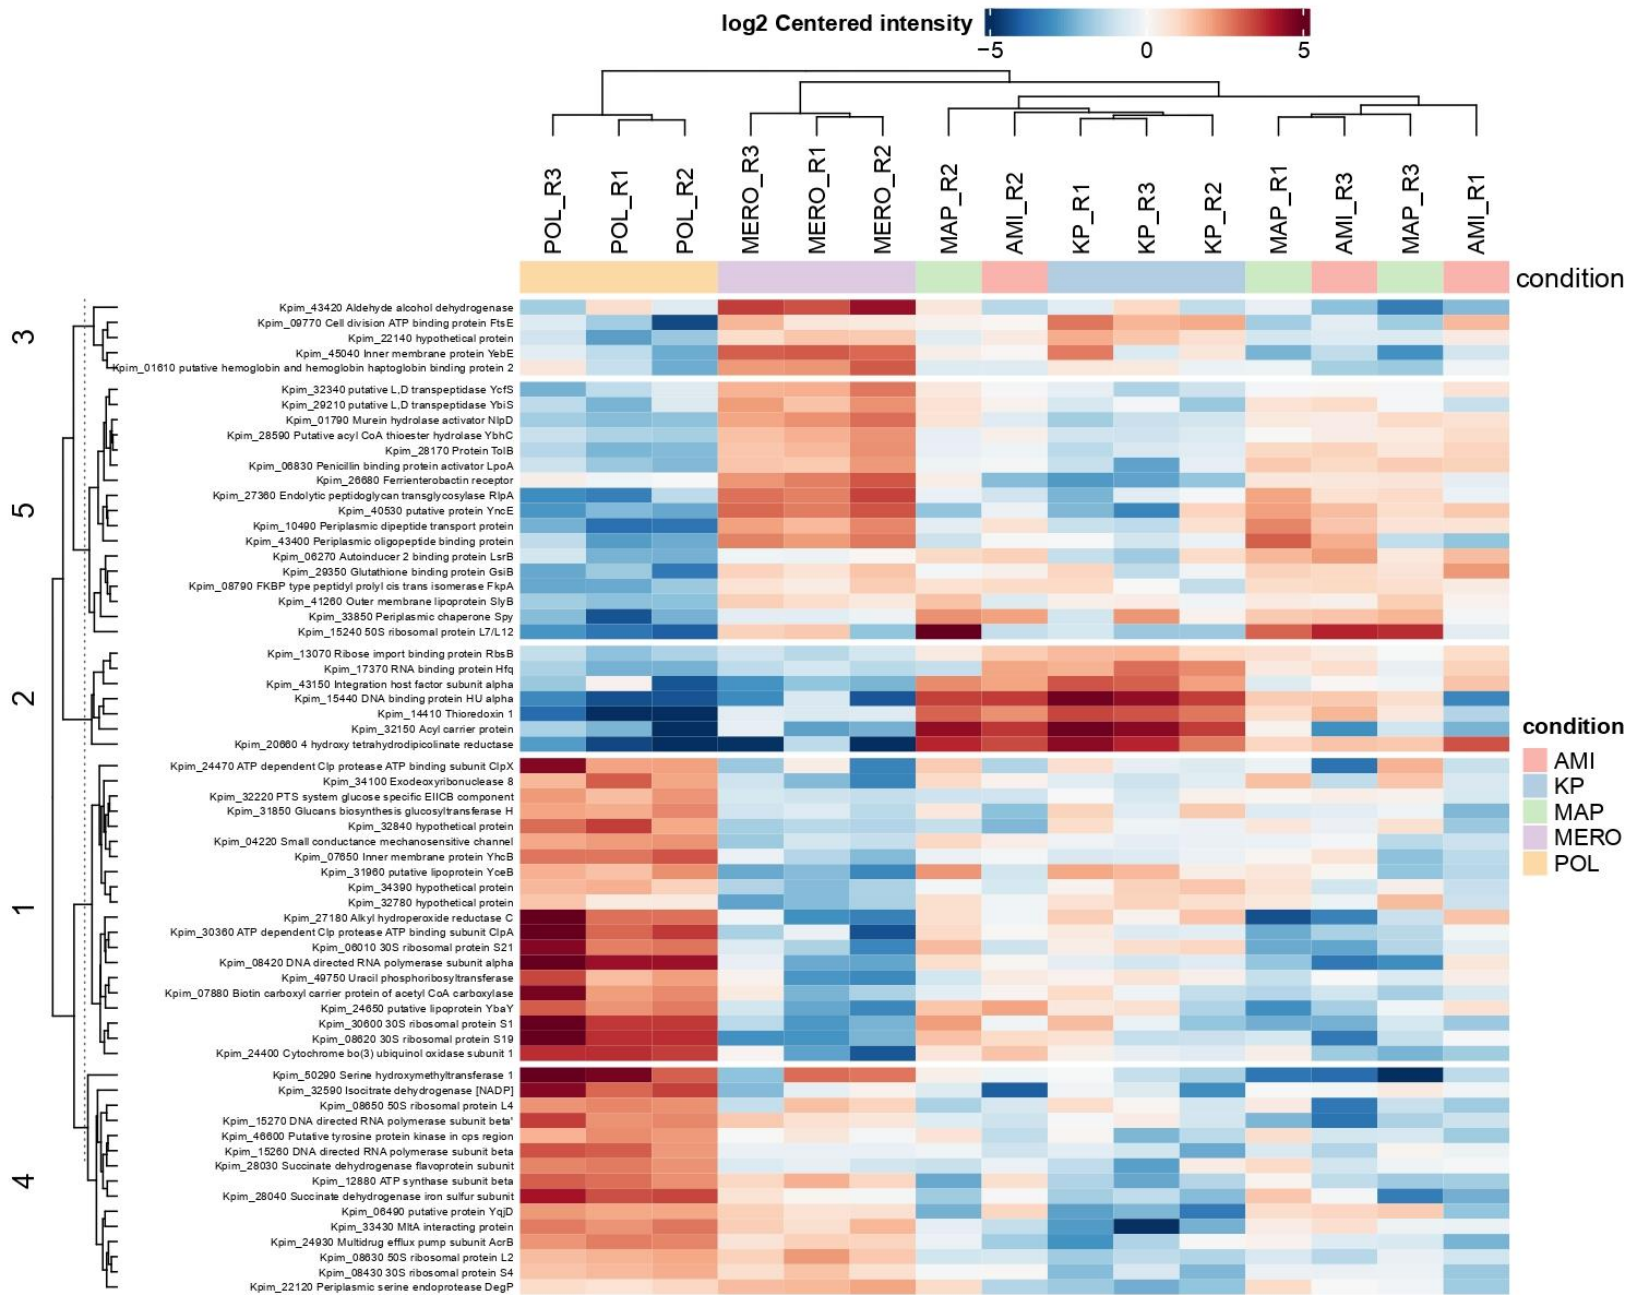

**Figure S2.** Gene Ontology analysis of all perturbed proteins in KpHCD1-OMVs after treatments with different antibiotics.

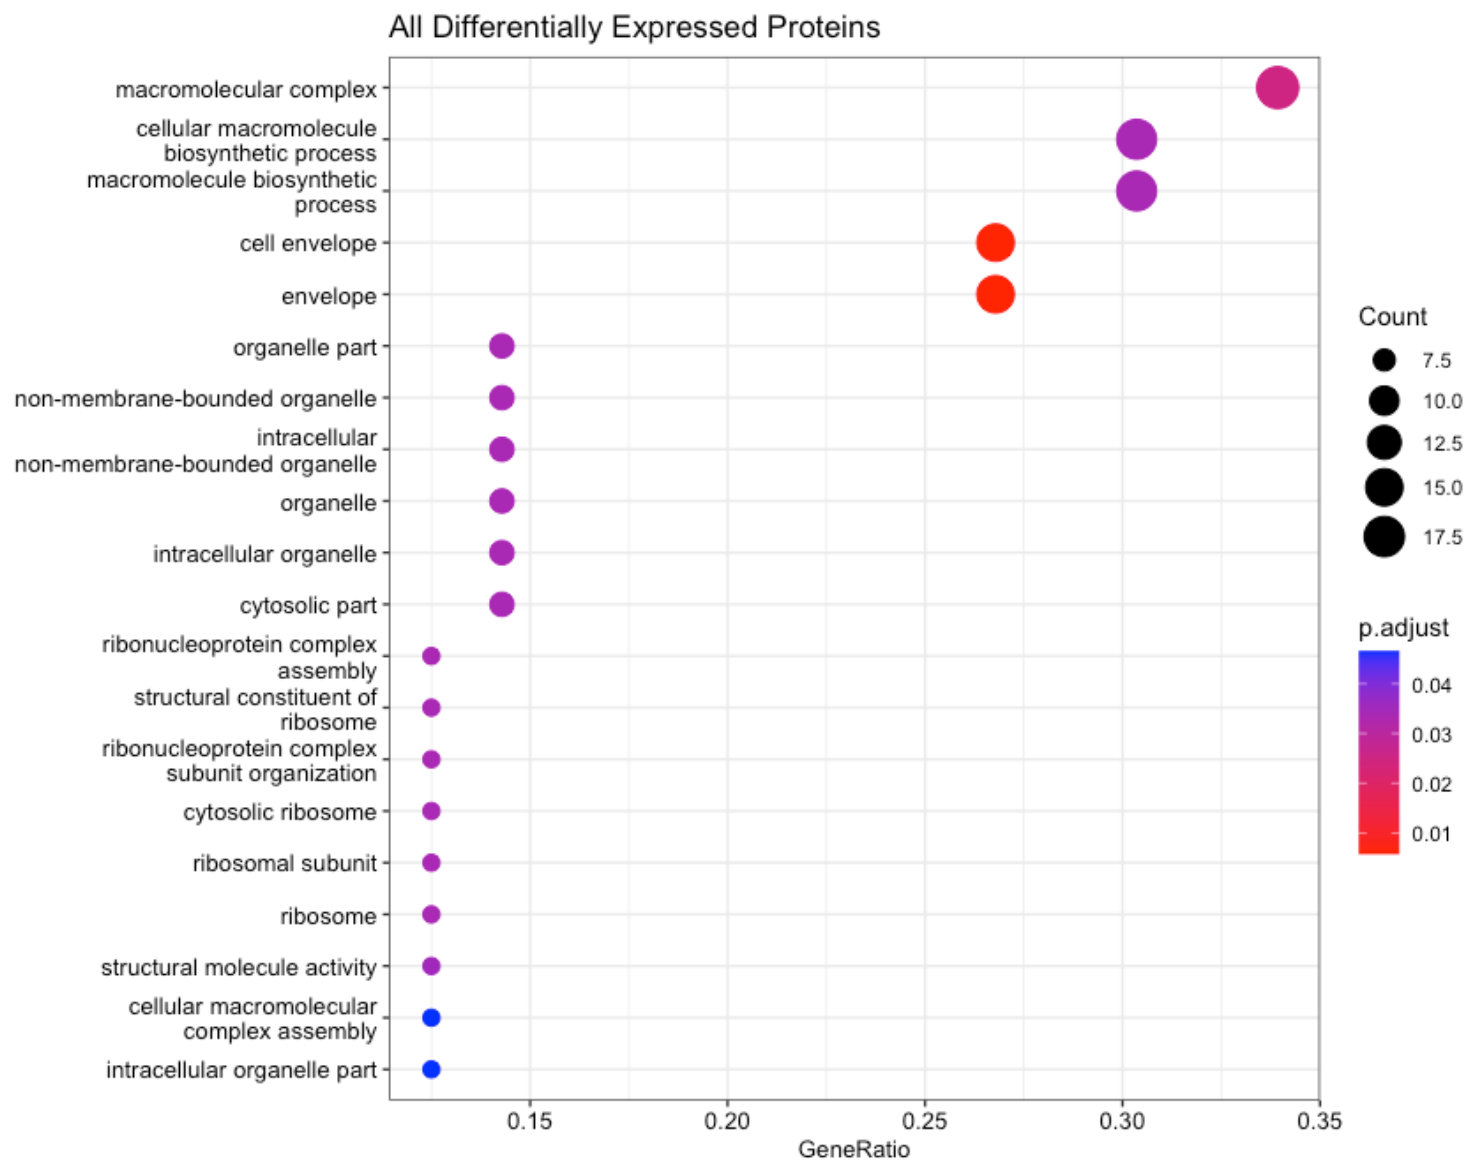

Supplement: s1 [file s1]
