# Supplementary material for: Modulation of Klebsiella pneumoniae Outer Membrane Vesicle Protein Cargo under Antibiotic Treatment
Source: Biomedicines. 2023 May 24;11(6):1515. doi: 10.3390/biomedicines11061515 (PMC10294825; doi:10.3390/biomedicines11061515)
Supplement: Supplementary file 1 [file biomedicines-11-01515-s001.zip]

Archive with 4 entries (4 files):
- Supplementary Fgures.pdf
- Table S1. Virulence factors identified in the KpHCD1 genome.xlsx
- Table S2. Ribosomal proteins identified in KpHCD1-OMVs after treatments with different anti-biotics.xlsx
- Table S3. Perturbed Proteins in KpHCD1-OMVs after Treatments with Different Antibiotics.xlsx
