# Supplementary material for: Modulation of Klebsiella pneumoniae Outer Membrane Vesicle Protein Cargo under Antibiotic Treatment
Source: Biomedicines. 2023 May 24;11(6):1515. doi: 10.3390/biomedicines11061515 (PMC10294825; doi:10.3390/biomedicines11061515)
Supplement: Supplementary file 1 [file biomedicines-11-01515-s001.zip › Table S1. Virulence factors identified in the KpHCD1 genome.xlsx]

## Sheet: Sheet1
Sequence_ID	Identity	Coverage	VF	VF_Name	VF_FullName	Bacteria	VFcategory	Characteristics	Structure	Function	Mechanism
Kpim_00400	61.148	0.995238	['VF0504']	AdeFGH efflux pump		Acinetobacter baumannii	Biofilm	Belongs to resistance-nodulation-cell division (RND)-type efflux system; RND efflux systems, composed of an inner membrane protein (RND pump) linked by a periplasmic adaptor protein (PAP) to an outer membrane factor (OMF), can extrude a wide range of substrates often unrelated in structure; To date, three Acinetobacter drug efflux (Ade) RND systems, AdeABC, AdeFGH, and AdeIJK, have been character…		Play a potential role in the synthesis and transport of autoinducer molecules during biofilm formation
Kpim_00870	57.54	0.984375	['VF0450']	FarAB	Fatty acid resistance system	Neisseria meningitidis	Antimicrobial activity/Competitive advantage	The far efflux system is composed of the FarA membrane fusion protein, the FarB cytoplasmic membrane transporter protein, and the MtrE protein as the outer membrane channel to export antibacterial fatty acids from inside the cell; belongs to Major Facilitator Superfamily (MFS) of efflux pumps and uses the proton motive force as an energy source for export of toxic agents		Mediates the resistance to antimicrobial long-chain fatty acids
Kpim_00900	73.099	1	['VF0406']	AI-2	Autoinducer-2	Vibrio cholerae	Biofilm	AI-2 is produced and detected by a wide variety of bacteria and is presumed to facilitate interspecies communications.	Furanosyl borate diester (2S,4S)-2-methyl-2,3,3,4-tetrahydroxytetrahydrofuran borate	LuxPQ receptor complex responds to the AI-2 molecule. Information from AI-2 is transduced through the LuxO protein to control the levels of the master transcription factor HapR. At low cell density, in the absence of autoinducers, HapR is not produced, so virulence factors are expressed and biofilms are formed. At high cell density, in the presence of autoinducers, LuxO is inactivated, HapR is pr…
Kpim_01010	76.667	0.983607	['VF0261']	CsrA		Legionella pneumophila	Regulation	Belongs to a highly conserved family of global regulators that typically control stationary phase traits post-transcriptionally		Post-transcriptional repression of the transmission regulon	Binds to particular mRNAs at a consensus sequence encompassing the ribosome binding site (RBS), destabilizing the mRNAs and preventing their translation
Kpim_01070	54.093	0.979094	['VF0455']	MntABC	Manganese transport system	Neisseria meningitidis	Stress survival	An ATP binding cassette (ABC) permease containing a periplasmic metal binding receptor protein (MBR), MntC		Quenches ROS that is independent of superoxide dismutase and catalase
Kpim_01620	65.192	0.988338	['VF0227']	Chu	E. coli heme uptake	Escherichia coli (UPEC)	Nutritional/Metabolic factor	ChuA encodes for a 69-kDa outer membrane protein responsible for heme uptake. The chuA nucleotide sequence shows high homology to shuA gene of S. dysenteriae type 1. The gene is part of a larger locus, termed the heme transport locus, which appears to be widely distributed among pathogenic E. coli strains		Iron uptake: the ability to use heme and/or hemoglobin might be especially advantageous to pathogenic bacteria. These pathogens often secrete cytotoxins, which gain access to the intracellular heme reservoir besides initiating tissue invasion. Cytotoxin production coupled with the capability to utilize heme and/or hemoglobin could serve as an effective iron acquisition strategy during the progres…
Kpim_01640	59.935	0.927492	['VF0227']	Chu	E. coli heme uptake	Escherichia coli (UPEC)	Nutritional/Metabolic factor	ChuA encodes for a 69-kDa outer membrane protein responsible for heme uptake. The chuA nucleotide sequence shows high homology to shuA gene of S. dysenteriae type 1. The gene is part of a larger locus, termed the heme transport locus, which appears to be widely distributed among pathogenic E. coli strains		Iron uptake: the ability to use heme and/or hemoglobin might be especially advantageous to pathogenic bacteria. These pathogens often secrete cytotoxins, which gain access to the intracellular heme reservoir besides initiating tissue invasion. Cytotoxin production coupled with the capability to utilize heme and/or hemoglobin could serve as an effective iron acquisition strategy during the progres…
Kpim_01650	51.984	0.972973	['VF0256']	Shu		Shigella dysenteriae	Nutritional/Metabolic factor	Heme utilization genes have been identified in numerous pathogens, including E. coli O157:H7, Yersinia pestis, Yersinia enterocolitica, Vibrio cholerae, Haemophilus influenzae, Neisseria meningitidis, etc.; Two heme-uptake systems:; (1) direct binding of heme or heme-containing proteins to specific outer membrane receptors; (2) secretion of hemophores to interact with the hemoproteins and present…		Shu heme utilization locus includes:; ShuA, TonB-denpendent heme receptor which is critical for the uptake of heme into the periplasm,; ShuT, putative periplasmic binding protein which specifically binds heme and acts as a soluble receptor for active uptake of heme into the cytoplasm; ShuU and ShuV comprise the cytoplasmic membrane permease and ATPase; ShuS, soluble cytoplasmic protein may functi…
Kpim_01660	63.804	0.970238	['VF0569']	T6SS		Klebsiella pneumoniae	Effector delivery system	Type VI bacterial lipase/phospholipase effectors (Tle) has been sub-divided into Tle1Tle5. The Tle1Tle4 families exhibit the GXSXG motif, while Tle5 present a dual HXKXXXXD motif		Antibacterial activity	The type VI membrane-targeting phospholipase effector Tle1 and Tli1 immunity proteins play a role in intraspecies antagonism
Kpim_01780	98.182	1	['VF0112']	RpoS		Salmonella enterica (serovar typhimurium)	Regulation			Necessary for sustaining a log-phase acid tolerance response (ATR), induction a stationary-phase acid survival system, production of thin aggregative fimbriae and expression of spv gene during stationary phase
Kpim_03430	100	1	['VF0567']	Type 3 fimbriae		Klebsiella pneumoniae	Biofilm	Approximately 2~4 nm wide and 0.5~2 <mu>m in length in length; mrkA gene expression is affected by c-di-GMP	Assembled by the chaperone/usher pathway	Mediating the formation of biofilms on biotic and abiotic surfaces	MrkD adhesin mediates binding to biotic surfaces
Kpim_03440	100	1	['VF0567']	Type 3 fimbriae		Klebsiella pneumoniae	Biofilm	Approximately 2~4 nm wide and 0.5~2 <mu>m in length in length; mrkA gene expression is affected by c-di-GMP	Assembled by the chaperone/usher pathway	Mediating the formation of biofilms on biotic and abiotic surfaces	MrkD adhesin mediates binding to biotic surfaces
Kpim_03450	99.58	1	['VF0567']	Type 3 fimbriae		Klebsiella pneumoniae	Biofilm	Approximately 2~4 nm wide and 0.5~2 <mu>m in length in length; mrkA gene expression is affected by c-di-GMP	Assembled by the chaperone/usher pathway	Mediating the formation of biofilms on biotic and abiotic surfaces	MrkD adhesin mediates binding to biotic surfaces
Kpim_03460	100	1	['VF0567']	Type 3 fimbriae		Klebsiella pneumoniae	Biofilm	Approximately 2~4 nm wide and 0.5~2 <mu>m in length in length; mrkA gene expression is affected by c-di-GMP	Assembled by the chaperone/usher pathway	Mediating the formation of biofilms on biotic and abiotic surfaces	MrkD adhesin mediates binding to biotic surfaces
Kpim_03470	99.698	1	['VF0567']	Type 3 fimbriae		Klebsiella pneumoniae	Biofilm	Approximately 2~4 nm wide and 0.5~2 <mu>m in length in length; mrkA gene expression is affected by c-di-GMP	Assembled by the chaperone/usher pathway	Mediating the formation of biofilms on biotic and abiotic surfaces	MrkD adhesin mediates binding to biotic surfaces
Kpim_03480	100	1	['VF0567']	Type 3 fimbriae		Klebsiella pneumoniae	Biofilm	Approximately 2~4 nm wide and 0.5~2 <mu>m in length in length; mrkA gene expression is affected by c-di-GMP	Assembled by the chaperone/usher pathway	Mediating the formation of biofilms on biotic and abiotic surfaces	MrkD adhesin mediates binding to biotic surfaces
Kpim_03490	100	1	['VF0567']	Type 3 fimbriae		Klebsiella pneumoniae	Biofilm	Approximately 2~4 nm wide and 0.5~2 <mu>m in length in length; mrkA gene expression is affected by c-di-GMP	Assembled by the chaperone/usher pathway	Mediating the formation of biofilms on biotic and abiotic surfaces	MrkD adhesin mediates binding to biotic surfaces
Kpim_03500	99.505	1	['VF0567']	Type 3 fimbriae		Klebsiella pneumoniae	Biofilm	Approximately 2~4 nm wide and 0.5~2 <mu>m in length in length; mrkA gene expression is affected by c-di-GMP	Assembled by the chaperone/usher pathway	Mediating the formation of biofilms on biotic and abiotic surfaces	MrkD adhesin mediates binding to biotic surfaces
Kpim_03550	99.502	1	['VF0566']	Type I fimbriae		Klebsiella pneumoniae	Adherence	Type I fimbriae are expressed in 90% of both clinical and environmental K. pneumoniae isolates as well as almost all members of the Enterobacteriaceae.; Type I fimbriae are filamentous, membrane-bound, adhesive structures composed primarily of FimA subunits, with the FimH subunit on the tip.		Adhering to human mucosal or epithelial surfaces
Kpim_03560	100	1	['VF0566']	Type I fimbriae		Klebsiella pneumoniae	Adherence	Type I fimbriae are expressed in 90% of both clinical and environmental K. pneumoniae isolates as well as almost all members of the Enterobacteriaceae.; Type I fimbriae are filamentous, membrane-bound, adhesive structures composed primarily of FimA subunits, with the FimH subunit on the tip.		Adhering to human mucosal or epithelial surfaces
Kpim_03570	100	1	['VF0566']	Type I fimbriae		Klebsiella pneumoniae	Adherence	Type I fimbriae are expressed in 90% of both clinical and environmental K. pneumoniae isolates as well as almost all members of the Enterobacteriaceae.; Type I fimbriae are filamentous, membrane-bound, adhesive structures composed primarily of FimA subunits, with the FimH subunit on the tip.		Adhering to human mucosal or epithelial surfaces
Kpim_03580	98.315	1	['VF0566']	Type I fimbriae		Klebsiella pneumoniae	Adherence	Type I fimbriae are expressed in 90% of both clinical and environmental K. pneumoniae isolates as well as almost all members of the Enterobacteriaceae.; Type I fimbriae are filamentous, membrane-bound, adhesive structures composed primarily of FimA subunits, with the FimH subunit on the tip.		Adhering to human mucosal or epithelial surfaces
Kpim_03590	99.145	1	['VF0566']	Type I fimbriae		Klebsiella pneumoniae	Adherence	Type I fimbriae are expressed in 90% of both clinical and environmental K. pneumoniae isolates as well as almost all members of the Enterobacteriaceae.; Type I fimbriae are filamentous, membrane-bound, adhesive structures composed primarily of FimA subunits, with the FimH subunit on the tip.		Adhering to human mucosal or epithelial surfaces
Kpim_03600	99.77	1	['VF0566']	Type I fimbriae		Klebsiella pneumoniae	Adherence	Type I fimbriae are expressed in 90% of both clinical and environmental K. pneumoniae isolates as well as almost all members of the Enterobacteriaceae.; Type I fimbriae are filamentous, membrane-bound, adhesive structures composed primarily of FimA subunits, with the FimH subunit on the tip.		Adhering to human mucosal or epithelial surfaces
Kpim_03610	98.286	1	['VF0566']	Type I fimbriae		Klebsiella pneumoniae	Adherence	Type I fimbriae are expressed in 90% of both clinical and environmental K. pneumoniae isolates as well as almost all members of the Enterobacteriaceae.; Type I fimbriae are filamentous, membrane-bound, adhesive structures composed primarily of FimA subunits, with the FimH subunit on the tip.		Adhering to human mucosal or epithelial surfaces
Kpim_03620	98.758	0.96988	['VF0566']	Type I fimbriae		Klebsiella pneumoniae	Adherence	Type I fimbriae are expressed in 90% of both clinical and environmental K. pneumoniae isolates as well as almost all members of the Enterobacteriaceae.; Type I fimbriae are filamentous, membrane-bound, adhesive structures composed primarily of FimA subunits, with the FimH subunit on the tip.		Adhering to human mucosal or epithelial surfaces
Kpim_03630	84.718	0.996689	['VF0221']	Type 1 fimbriae		Escherichia coli (UPEC)	Adherence	Mannose-sensitive (MSHA) fimbriae, the ability to hemagglutinate erythrocytes was blocked by the presence of mannose; the genes responsible for type I fimbriae are found in almost all subgroups of E.coli, not just in UPEC strains, but the fimbriae function as a virulence factor in the pathogenesis of E.coli UTI; Expression of type I fimbriae undergoes phase variation controlled at the transcripti…	FimC-FimH chaperone adhesin complex: 1QUN	Makes an important contribution to colonization of the bladder	FimH is the adhesin protein binding to mannose-containing glycoprotein receptors, known as uroplakins, which are located on the luminal surface of the bladder epithelial cells. This binding is followed by invasion of uroepithelia cells
Kpim_03640	99.091	1	['VF0566']	Type I fimbriae		Klebsiella pneumoniae	Adherence	Type I fimbriae are expressed in 90% of both clinical and environmental K. pneumoniae isolates as well as almost all members of the Enterobacteriaceae.; Type I fimbriae are filamentous, membrane-bound, adhesive structures composed primarily of FimA subunits, with the FimH subunit on the tip.		Adhering to human mucosal or epithelial surfaces
Kpim_04590	55.959	0.979695	['VF0044']	LOS		Haemophilus influenzae	Immune modulation	Lic1A (phosphorylcholine (ChoP) kinase) 5'-CAAT-3' within the 5'-end of its coding sequence; lic2A, also referred to as lexA, variation in the number of 5'-CAAT-3' repeats has been shown to correlate directly with phase variation of the Gal-<alpha>(1-4)<beta>-Gal LPS structure; But lgtC (glycosyltransferase), another phase-variable gene, ultimately dictates whether this structure is synthesized. …	Comprising Lipid A, an inner core of one molecule 3-deoxy-D-manno-oct-2-ulopyranosonic acid (Kdo) and three molecules of heptose, and an outer core composed of a heteropolymer of the neutral sugars glucose and galactose. Substitution of the out core with phosphorylcholine or sialic acid results in the heterogeneity of LPS; Lack O-antigen	Major immunogen; LOS phosphorylcholine (ChoP) may influence invasion via interaction with PAF receptor and stimulates of inflammatory signals; LPS phase variation is characterized by the spontaneous loss and gain of oligosaccharide structures present in the outer core. the phase variable expression of LPS biosynthesis genes promotes evasion of antigen-specific host immune defences and allow colon…	Lic1(lic1A-lic1D) responsible for the addition of phosphorylcholine to LPS. lic1A mediates phase variation (tetranucleotide repeat region); phase-variable gene lic3A encodes an <alpha>-2,3-sialyltransferase that is responsible for the addition of Neu5Ac to terminal lactose in the LPS, LPS sialylation has been shown to be important for resistance to the killing effectors of normal human serum
Kpim_05830	70.172	0.976939	['VF0044']	LOS		Haemophilus influenzae	Immune modulation	Lic1A (phosphorylcholine (ChoP) kinase) 5'-CAAT-3' within the 5'-end of its coding sequence; lic2A, also referred to as lexA, variation in the number of 5'-CAAT-3' repeats has been shown to correlate directly with phase variation of the Gal-<alpha>(1-4)<beta>-Gal LPS structure; But lgtC (glycosyltransferase), another phase-variable gene, ultimately dictates whether this structure is synthesized. …	Comprising Lipid A, an inner core of one molecule 3-deoxy-D-manno-oct-2-ulopyranosonic acid (Kdo) and three molecules of heptose, and an outer core composed of a heteropolymer of the neutral sugars glucose and galactose. Substitution of the out core with phosphorylcholine or sialic acid results in the heterogeneity of LPS; Lack O-antigen	Major immunogen; LOS phosphorylcholine (ChoP) may influence invasion via interaction with PAF receptor and stimulates of inflammatory signals; LPS phase variation is characterized by the spontaneous loss and gain of oligosaccharide structures present in the outer core. the phase variable expression of LPS biosynthesis genes promotes evasion of antigen-specific host immune defences and allow colon…	Lic1(lic1A-lic1D) responsible for the addition of phosphorylcholine to LPS. lic1A mediates phase variation (tetranucleotide repeat region); phase-variable gene lic3A encodes an <alpha>-2,3-sialyltransferase that is responsible for the addition of Neu5Ac to terminal lactose in the LPS, LPS sialylation has been shown to be important for resistance to the killing effectors of normal human serum
Kpim_05920	57	1	['VF0050']	Urease		Helicobacter pylori	Stress survival		~550kDa nickel metalloenzyme comprised of two distinct subunits-UreA and UreB, the UreEFGH proteins are required for activation of urease by incorporating nickel ions into the urease apoenzyme, UreI functions as an acid-dependent urea channel; PDB code: 1E9Z	An important colonization factor, contributes to acid resistance, epithelial cell damage, chemotactic behavior, and nitrogen metabolism	A Ni2+-containing enzyme, catalyzes the hydrolysis of urea to ammonium and carbon dioxide. Urea channels (UreI) present in the inner membrane are opened at pH<6.5, allowing delivery of urea to urease. The ammonia produced diffuses into, and thus buffers the periplasm.
Kpim_05930	50.515	0.915094	['VF0050']	Urease		Helicobacter pylori	Stress survival		~550kDa nickel metalloenzyme comprised of two distinct subunits-UreA and UreB, the UreEFGH proteins are required for activation of urease by incorporating nickel ions into the urease apoenzyme, UreI functions as an acid-dependent urea channel; PDB code: 1E9Z	An important colonization factor, contributes to acid resistance, epithelial cell damage, chemotactic behavior, and nitrogen metabolism	A Ni2+-containing enzyme, catalyzes the hydrolysis of urea to ammonium and carbon dioxide. Urea channels (UreI) present in the inner membrane are opened at pH<6.5, allowing delivery of urea to urease. The ammonia produced diffuses into, and thus buffers the periplasm.
Kpim_05940	61.687	1.00353	['VF0050']	Urease		Helicobacter pylori	Stress survival		~550kDa nickel metalloenzyme comprised of two distinct subunits-UreA and UreB, the UreEFGH proteins are required for activation of urease by incorporating nickel ions into the urease apoenzyme, UreI functions as an acid-dependent urea channel; PDB code: 1E9Z	An important colonization factor, contributes to acid resistance, epithelial cell damage, chemotactic behavior, and nitrogen metabolism	A Ni2+-containing enzyme, catalyzes the hydrolysis of urea to ammonium and carbon dioxide. Urea channels (UreI) present in the inner membrane are opened at pH<6.5, allowing delivery of urea to urease. The ammonia produced diffuses into, and thus buffers the periplasm.
Kpim_05980	63.265	0.956098	['VF0050']	Urease		Helicobacter pylori	Stress survival		~550kDa nickel metalloenzyme comprised of two distinct subunits-UreA and UreB, the UreEFGH proteins are required for activation of urease by incorporating nickel ions into the urease apoenzyme, UreI functions as an acid-dependent urea channel; PDB code: 1E9Z	An important colonization factor, contributes to acid resistance, epithelial cell damage, chemotactic behavior, and nitrogen metabolism	A Ni2+-containing enzyme, catalyzes the hydrolysis of urea to ammonium and carbon dioxide. Urea channels (UreI) present in the inner membrane are opened at pH<6.5, allowing delivery of urea to urease. The ammonia produced diffuses into, and thus buffers the periplasm.
Kpim_07080	50.704	1.01429	['VF0696']	T4SS secreted effectors		Coxiella burnetii	Effector delivery system			CBUA0020; CBU_0012*; CBU_0113; CBU_0122; CBU_0183; CBU_0201; CBU_0270; CBU_0295; CBU_0344*; CBU_0372; CBU_0375*; CBU_0469; CBU_0513; CBU_0534; CBU_0590; CBU_0635; CBU_0637; CBU_0820*; CBU_1048*; CBU_1079; CBU_1107*; CBU_1150*; CBU_1198; CBU_1268; CBU_1349; CBU_1370; CBU_1409; CBU_1434; CBU_1493; CBU_1495*; CBU_1525*; CBU_1530; CBU_1566; CBU_1576; CBU_1594; CBU_1607; CBU_1614; CBU_1639; CBU_1665; …
Kpim_07440	53.4	1.04822	['VF0082']	Type IV pili		Pseudomonas aeruginosa	Adherence	PilA, B, C, D, E, F, M, N, O, P, Q, T, U, V, W, X, Y1, Y2, Z, and fimT, U, V are involved in the biogenesis and mechanical function of pili, pilG, H, I, K, chpA, B, C, D, E, pilS, R, fimS, rpoN, algR, algU, and vfr are involved in transcriptional regulation and chemosensory pathways that control the expression or activity of the twitching motility of the pili		Attaches to host cells, but not to mucin, causing a twitching motility that allows the bacteria to move along the cell surface; biofilm formation	The C-terminal receptor-binding domain of pilin binds to asialoGM1 gangliosides on host cells. Generally, GM1 gangliosides contain a sialic acid moiety. P.aeruginosa produces a neuraminidase which removes sialic acid residues from the GM1 to form the asialoGM1, which is a better receptor for the pili; The asialoGM1 is present in increased abundance on the surface of cystic fibrosis respiratory ep…
Kpim_08190	70.053	0.986807	['VF0568']	AcrAB		Klebsiella pneumoniae	Antimicrobial activity/Competitive advantage			May mediate resistance against host-derived antimicrobial peptides; associated with antibiotic resistance
Kpim_08200	81.336	0.982625	['VF0568']	AcrAB		Klebsiella pneumoniae	Antimicrobial activity/Competitive advantage			May mediate resistance against host-derived antimicrobial peptides; associated with antibiotic resistance
Kpim_08710	76.336	1.06504	['VF0460']	EF-Tu		Francisella tularensis	Adherence			Surface-expressed elongation factor-Tu (EF-Tu) mediates attachment by interacting with host cell nucleolin
Kpim_08900	67.327	0.961905	['VF0082']	Type IV pili		Pseudomonas aeruginosa	Adherence	PilA, B, C, D, E, F, M, N, O, P, Q, T, U, V, W, X, Y1, Y2, Z, and fimT, U, V are involved in the biogenesis and mechanical function of pili, pilG, H, I, K, chpA, B, C, D, E, pilS, R, fimS, rpoN, algR, algU, and vfr are involved in transcriptional regulation and chemosensory pathways that control the expression or activity of the twitching motility of the pili		Attaches to host cells, but not to mucin, causing a twitching motility that allows the bacteria to move along the cell surface; biofilm formation	The C-terminal receptor-binding domain of pilin binds to asialoGM1 gangliosides on host cells. Generally, GM1 gangliosides contain a sialic acid moiety. P.aeruginosa produces a neuraminidase which removes sialic acid residues from the GM1 to form the asialoGM1, which is a better receptor for the pili; The asialoGM1 is present in increased abundance on the surface of cystic fibrosis respiratory ep…
Kpim_09050	65.315	0.986667	['VF0543']	Capsule		Francisella tularensis	Immune modulation	Group 4 capsule; high molecular weight (HMW) O-antigen capsule	A polymer of the tetrasaccharide repeat, 4)-a-D-GalNAcAN-(1-.4)-a-D-GalNAcAN-(1-.3)-b-D-QuiNAc-(1-.2)-b-D-Qui4NFm-(1-, which is identical to F. tularensis O-antigen subunit; F. tularensis synthesizes an O-antigen capsule containing approximately 125 to 300 or more O-antigen repeating units	Providing a stealth shield that prevents the host immune system from detecting this potent pathogen
Kpim_09560	51.964	0.963855	['VF0553']	GGT	<gamma>-glutamyl transpeptidase	Francisella tularensis	Nutritional/Metabolic factor			Cleavage of cysteine containing peptides (glutathione and <gamma>-glutamyl-cysteine peptides) by GGT activity thus provides the essential source of cysteine required for intracellular multiplication
Kpim_11170	78.247	0.993548	['VF0044']	LOS		Haemophilus influenzae	Immune modulation	Lic1A (phosphorylcholine (ChoP) kinase) 5'-CAAT-3' within the 5'-end of its coding sequence; lic2A, also referred to as lexA, variation in the number of 5'-CAAT-3' repeats has been shown to correlate directly with phase variation of the Gal-<alpha>(1-4)<beta>-Gal LPS structure; But lgtC (glycosyltransferase), another phase-variable gene, ultimately dictates whether this structure is synthesized. …	Comprising Lipid A, an inner core of one molecule 3-deoxy-D-manno-oct-2-ulopyranosonic acid (Kdo) and three molecules of heptose, and an outer core composed of a heteropolymer of the neutral sugars glucose and galactose. Substitution of the out core with phosphorylcholine or sialic acid results in the heterogeneity of LPS; Lack O-antigen	Major immunogen; LOS phosphorylcholine (ChoP) may influence invasion via interaction with PAF receptor and stimulates of inflammatory signals; LPS phase variation is characterized by the spontaneous loss and gain of oligosaccharide structures present in the outer core. the phase variable expression of LPS biosynthesis genes promotes evasion of antigen-specific host immune defences and allow colon…	Lic1(lic1A-lic1D) responsible for the addition of phosphorylcholine to LPS. lic1A mediates phase variation (tetranucleotide repeat region); phase-variable gene lic3A encodes an <alpha>-2,3-sialyltransferase that is responsible for the addition of Neu5Ac to terminal lactose in the LPS, LPS sialylation has been shown to be important for resistance to the killing effectors of normal human serum
Kpim_11180	61.905	0.994083	['VF0044']	LOS		Haemophilus influenzae	Immune modulation	Lic1A (phosphorylcholine (ChoP) kinase) 5'-CAAT-3' within the 5'-end of its coding sequence; lic2A, also referred to as lexA, variation in the number of 5'-CAAT-3' repeats has been shown to correlate directly with phase variation of the Gal-<alpha>(1-4)<beta>-Gal LPS structure; But lgtC (glycosyltransferase), another phase-variable gene, ultimately dictates whether this structure is synthesized. …	Comprising Lipid A, an inner core of one molecule 3-deoxy-D-manno-oct-2-ulopyranosonic acid (Kdo) and three molecules of heptose, and an outer core composed of a heteropolymer of the neutral sugars glucose and galactose. Substitution of the out core with phosphorylcholine or sialic acid results in the heterogeneity of LPS; Lack O-antigen	Major immunogen; LOS phosphorylcholine (ChoP) may influence invasion via interaction with PAF receptor and stimulates of inflammatory signals; LPS phase variation is characterized by the spontaneous loss and gain of oligosaccharide structures present in the outer core. the phase variable expression of LPS biosynthesis genes promotes evasion of antigen-specific host immune defences and allow colon…	Lic1(lic1A-lic1D) responsible for the addition of phosphorylcholine to LPS. lic1A mediates phase variation (tetranucleotide repeat region); phase-variable gene lic3A encodes an <alpha>-2,3-sialyltransferase that is responsible for the addition of Neu5Ac to terminal lactose in the LPS, LPS sialylation has been shown to be important for resistance to the killing effectors of normal human serum
Kpim_11190	57.823	0.910217	['VF0085']	LPS		Pseudomonas aeruginosa	Immune modulation	Two distinct forms of LPS: A-band and B-band. A-band is a homopolymer of <alpha>-linked D-rhamnose, whereas B-band LPS is a heteropolymer		Mediates biological effects including resistance to serum killing and phagocytosis; the binding to normal CFTR (cystic fibrosis transmembrane conductance regulator) and invasion of host cells may make a contribution to virulence in the human eye; internalization by binding to normal CFTR protein expressed by airway epithelial cells followed by desquamation of bacteria-laden epithelial cells, cons…	Binding interaction occurs between the first extracellular loop of CFTR (predicted to be in amino acids 108-117 of the mature protein) and the complete outer portion of the core polysaccharide of the LPS
Kpim_11280	52.381	0.990566	['VF0044']	LOS		Haemophilus influenzae	Immune modulation	Lic1A (phosphorylcholine (ChoP) kinase) 5'-CAAT-3' within the 5'-end of its coding sequence; lic2A, also referred to as lexA, variation in the number of 5'-CAAT-3' repeats has been shown to correlate directly with phase variation of the Gal-<alpha>(1-4)<beta>-Gal LPS structure; But lgtC (glycosyltransferase), another phase-variable gene, ultimately dictates whether this structure is synthesized. …	Comprising Lipid A, an inner core of one molecule 3-deoxy-D-manno-oct-2-ulopyranosonic acid (Kdo) and three molecules of heptose, and an outer core composed of a heteropolymer of the neutral sugars glucose and galactose. Substitution of the out core with phosphorylcholine or sialic acid results in the heterogeneity of LPS; Lack O-antigen	Major immunogen; LOS phosphorylcholine (ChoP) may influence invasion via interaction with PAF receptor and stimulates of inflammatory signals; LPS phase variation is characterized by the spontaneous loss and gain of oligosaccharide structures present in the outer core. the phase variable expression of LPS biosynthesis genes promotes evasion of antigen-specific host immune defences and allow colon…	Lic1(lic1A-lic1D) responsible for the addition of phosphorylcholine to LPS. lic1A mediates phase variation (tetranucleotide repeat region); phase-variable gene lic3A encodes an <alpha>-2,3-sialyltransferase that is responsible for the addition of Neu5Ac to terminal lactose in the LPS, LPS sialylation has been shown to be important for resistance to the killing effectors of normal human serum
Kpim_11290	51.23	0.945736	['VF0044']	LOS		Haemophilus influenzae	Immune modulation	Lic1A (phosphorylcholine (ChoP) kinase) 5'-CAAT-3' within the 5'-end of its coding sequence; lic2A, also referred to as lexA, variation in the number of 5'-CAAT-3' repeats has been shown to correlate directly with phase variation of the Gal-<alpha>(1-4)<beta>-Gal LPS structure; But lgtC (glycosyltransferase), another phase-variable gene, ultimately dictates whether this structure is synthesized. …	Comprising Lipid A, an inner core of one molecule 3-deoxy-D-manno-oct-2-ulopyranosonic acid (Kdo) and three molecules of heptose, and an outer core composed of a heteropolymer of the neutral sugars glucose and galactose. Substitution of the out core with phosphorylcholine or sialic acid results in the heterogeneity of LPS; Lack O-antigen	Major immunogen; LOS phosphorylcholine (ChoP) may influence invasion via interaction with PAF receptor and stimulates of inflammatory signals; LPS phase variation is characterized by the spontaneous loss and gain of oligosaccharide structures present in the outer core. the phase variable expression of LPS biosynthesis genes promotes evasion of antigen-specific host immune defences and allow colon…	Lic1(lic1A-lic1D) responsible for the addition of phosphorylcholine to LPS. lic1A mediates phase variation (tetranucleotide repeat region); phase-variable gene lic3A encodes an <alpha>-2,3-sialyltransferase that is responsible for the addition of Neu5Ac to terminal lactose in the LPS, LPS sialylation has been shown to be important for resistance to the killing effectors of normal human serum
Kpim_11850	52.03	1.00743	['VF0513']	IlpA	Immunogenic lipoprotein A	Vibrio vulnificus	Adherence			Dual functions as an adhesin and an immunostimulant	A lipoprotein that stimulates production of proinflammatory cytokines via TLR2 in human monocytes; involved in bacterial adherence to host cells
Kpim_11940	50.269	0.994652	['VF0568']	AcrAB		Klebsiella pneumoniae	Antimicrobial activity/Competitive advantage			May mediate resistance against host-derived antimicrobial peptides; associated with antibiotic resistance
Kpim_11950	57.087	0.981643	['VF0568']	AcrAB		Klebsiella pneumoniae	Antimicrobial activity/Competitive advantage			May mediate resistance against host-derived antimicrobial peptides; associated with antibiotic resistance
Kpim_12860	50.776	0.989035	['VF0542']	LPS		Francisella tularensis	Immune modulation	The structure of Francisella spp. lipid A is unique in that it is modified by various carbohydrates that greatly reduce TLR4 activation and allow for immune evasion		A key virulence factor does not signal through, and is not an agonist of, toll like receptor 4 (TLR-4) and has little endotoxic activity	Francisella lipid A is a very poor stimulant of the host's innate immunity. The lack of immune recognition of Franciscella lipid A has been attributed to several structural differences compared to E. coli lipid A. These include (1) the absence of phosphate at the 40 position as well as the modification of 1-phosphate with GalN and (2) tetraacylation of lipid A with longer acyl chains (1618 carbo…
Kpim_14430	58.501	0.945504	['VF0044']	LOS		Haemophilus influenzae	Immune modulation	Lic1A (phosphorylcholine (ChoP) kinase) 5'-CAAT-3' within the 5'-end of its coding sequence; lic2A, also referred to as lexA, variation in the number of 5'-CAAT-3' repeats has been shown to correlate directly with phase variation of the Gal-<alpha>(1-4)<beta>-Gal LPS structure; But lgtC (glycosyltransferase), another phase-variable gene, ultimately dictates whether this structure is synthesized. …	Comprising Lipid A, an inner core of one molecule 3-deoxy-D-manno-oct-2-ulopyranosonic acid (Kdo) and three molecules of heptose, and an outer core composed of a heteropolymer of the neutral sugars glucose and galactose. Substitution of the out core with phosphorylcholine or sialic acid results in the heterogeneity of LPS; Lack O-antigen	Major immunogen; LOS phosphorylcholine (ChoP) may influence invasion via interaction with PAF receptor and stimulates of inflammatory signals; LPS phase variation is characterized by the spontaneous loss and gain of oligosaccharide structures present in the outer core. the phase variable expression of LPS biosynthesis genes promotes evasion of antigen-specific host immune defences and allow colon…	Lic1(lic1A-lic1D) responsible for the addition of phosphorylcholine to LPS. lic1A mediates phase variation (tetranucleotide repeat region); phase-variable gene lic3A encodes an <alpha>-2,3-sialyltransferase that is responsible for the addition of Neu5Ac to terminal lactose in the LPS, LPS sialylation has been shown to be important for resistance to the killing effectors of normal human serum
Kpim_14450	51.389	0.99723	['VF0144']	Capsule		Streptococcus pneumoniae	Immune modulation	Ninety different capsule types have been identified. Each has a structurally distinct capsule, composed of repeating oligosaccharide units joined by glycosidic linkages		Resistant to complement deposition and masks cell wall-associated complement from being recognized by the complement receptors on phagocytes
Kpim_14470	64.881	0.946479	['VF0044']	LOS		Haemophilus influenzae	Immune modulation	Lic1A (phosphorylcholine (ChoP) kinase) 5'-CAAT-3' within the 5'-end of its coding sequence; lic2A, also referred to as lexA, variation in the number of 5'-CAAT-3' repeats has been shown to correlate directly with phase variation of the Gal-<alpha>(1-4)<beta>-Gal LPS structure; But lgtC (glycosyltransferase), another phase-variable gene, ultimately dictates whether this structure is synthesized. …	Comprising Lipid A, an inner core of one molecule 3-deoxy-D-manno-oct-2-ulopyranosonic acid (Kdo) and three molecules of heptose, and an outer core composed of a heteropolymer of the neutral sugars glucose and galactose. Substitution of the out core with phosphorylcholine or sialic acid results in the heterogeneity of LPS; Lack O-antigen	Major immunogen; LOS phosphorylcholine (ChoP) may influence invasion via interaction with PAF receptor and stimulates of inflammatory signals; LPS phase variation is characterized by the spontaneous loss and gain of oligosaccharide structures present in the outer core. the phase variable expression of LPS biosynthesis genes promotes evasion of antigen-specific host immune defences and allow colon…	Lic1(lic1A-lic1D) responsible for the addition of phosphorylcholine to LPS. lic1A mediates phase variation (tetranucleotide repeat region); phase-variable gene lic3A encodes an <alpha>-2,3-sialyltransferase that is responsible for the addition of Neu5Ac to terminal lactose in the LPS, LPS sialylation has been shown to be important for resistance to the killing effectors of normal human serum
Kpim_14480	64.948	0.993174	['VF0542']	LPS		Francisella tularensis	Immune modulation	The structure of Francisella spp. lipid A is unique in that it is modified by various carbohydrates that greatly reduce TLR4 activation and allow for immune evasion		A key virulence factor does not signal through, and is not an agonist of, toll like receptor 4 (TLR-4) and has little endotoxic activity	Francisella lipid A is a very poor stimulant of the host's innate immunity. The lack of immune recognition of Franciscella lipid A has been attributed to several structural differences compared to E. coli lipid A. These include (1) the absence of phosphate at the 40 position as well as the modification of 1-phosphate with GalN and (2) tetraacylation of lipid A with longer acyl chains (1618 carbo…
Kpim_15180	79.898	0.997462	['VF0460']	EF-Tu		Francisella tularensis	Adherence			Surface-expressed elongation factor-Tu (EF-Tu) mediates attachment by interacting with host cell nucleolin
Kpim_15580	62.295	0.972665	['VF0253']	Isocitrate lyase		Mycobacterium tuberculosis	Others		PDB code: 1F61	Required for persistent infection	Isocitrate lyase is the initial enzyme in the glyoxylate shunt, a secondary metabolic pathway that allows bacteria to utilize fatty acids as carbon and energy sources when the availability of primary carbon sources is limiting; Isocitrate lyase, in combination with malate synthase, catalyzes the conversion of isocitrate to malate, a reaction that allows maintenance of the TCA cycle and synthesize…
Kpim_16130	74.933	0.992021	['VF0562']	Ent	Enterobactin	Klebsiella pneumoniae	Nutritional/Metabolic factor	Various iron acquisition systems in Klebsiella are needed to overcome host defenses in different anatomical compartments.	Prototypic catecholate siderophore; the highest known affinity for iron of any molecule; To counter the effects of Ent, neutrophils and epithelial cells secrete lipocalin 2 (Lcn2 also known as NGAL, Scn, and 24p3), which binds Ent with subnanomolar affinity	May be necessary for penetration to deeper tissues
Kpim_16840	53.155	0.932127	['VF0472']	PNAG		Acinetobacter baumannii	Biofilm	PNAG is produced by the Pga machinery consisting of PgaABCD proteins. Pga complex probably spans the inner and outer bacterial membrane. PgaC and PgaD form an inner membrane-intergrated complex. PgaC is the cataytic glycosyltransferase containing 4-5 predicted transmembrane helices (TMHs). PgaD probably contains two TMHs with a short periplasmic loop and small cytosolic C terminus. PgaA is an out…	<beta>-(1-->6)-Poly-N-acetyl-D-glucosamine (PNAG) is a surface polysaccharide produced by many pathogens, including S. aureus, E. coli, Y. pestis, B. pertussis, A. baumannii and others	Critical for biofilm formation
Kpim_16990	75.665	0.959854	['VF0159']	Hsp60		Legionella pneumophila	Adherence			Mediate a complement-independent attachment to mammalian and amoebal host cells	Specific receptors have not been identified
Kpim_18230	53.555	0.966741	['VF0106']	MgtBC		Salmonella enterica (serovar typhimurium)	Nutritional/Metabolic factor	Hypothesized to be a magnesium transporter		MgtA and MgtB are not required for intracellular survival or for virulence, MgtC is essential for both functions
Kpim_18770	53.988	1.02516	['VF0569']	T6SS		Klebsiella pneumoniae	Effector delivery system	Type VI bacterial lipase/phospholipase effectors (Tle) has been sub-divided into Tle1Tle5. The Tle1Tle4 families exhibit the GXSXG motif, while Tle5 present a dual HXKXXXXD motif		Antibacterial activity	The type VI membrane-targeting phospholipase effector Tle1 and Tli1 immunity proteins play a role in intraspecies antagonism
Kpim_19020	74.837	1	['VF0237']	Ibes	Invasion of brain endothelial cells	Escherichia coli (NMEC)	Invasion	IbeA is unique to E. coli K1. The ibeB and ibeC are found to have K12 homologues p77211 and yijP respectively.	IbeA and IbeB encode outer membrane proteins with three and two transmembrane domains, respectively; IbeC has a signal peptide-like sequence and five or six transmembrane segments at its N terminus	Contributes to brain microvascular endothelial cells (BMECs) invasion via a ligand-receptor interaction	Unknown; the roles of Ibe proteins in E. coli K1 invasion of BMECs were verified by deletion and complementation experiments
Kpim_20690	57.263	1	['VF0558']	Pyrimidine biosynthesis		Francisella tularensis	Nutritional/Metabolic factor	CarB, CarA, and PyrB encode the large and small subunits of carbamoylphosphate synthetase and aspartate carbamoyl transferase, respectively. These enzymes catalyze the first two steps in the pyrimidine nucleotide biosynthetic pathway in many bacteria, including Francisella, and are required for the virulence of several pathogens, including Salmonella and E. coli		Mediating bacterial resistance to reactive oxygen species (ROS) that is important for phagosomal escape
Kpim_21310	77.632	0.996721	['VF0044']	LOS		Haemophilus influenzae	Immune modulation	Lic1A (phosphorylcholine (ChoP) kinase) 5'-CAAT-3' within the 5'-end of its coding sequence; lic2A, also referred to as lexA, variation in the number of 5'-CAAT-3' repeats has been shown to correlate directly with phase variation of the Gal-<alpha>(1-4)<beta>-Gal LPS structure; But lgtC (glycosyltransferase), another phase-variable gene, ultimately dictates whether this structure is synthesized. …	Comprising Lipid A, an inner core of one molecule 3-deoxy-D-manno-oct-2-ulopyranosonic acid (Kdo) and three molecules of heptose, and an outer core composed of a heteropolymer of the neutral sugars glucose and galactose. Substitution of the out core with phosphorylcholine or sialic acid results in the heterogeneity of LPS; Lack O-antigen	Major immunogen; LOS phosphorylcholine (ChoP) may influence invasion via interaction with PAF receptor and stimulates of inflammatory signals; LPS phase variation is characterized by the spontaneous loss and gain of oligosaccharide structures present in the outer core. the phase variable expression of LPS biosynthesis genes promotes evasion of antigen-specific host immune defences and allow colon…	Lic1(lic1A-lic1D) responsible for the addition of phosphorylcholine to LPS. lic1A mediates phase variation (tetranucleotide repeat region); phase-variable gene lic3A encodes an <alpha>-2,3-sialyltransferase that is responsible for the addition of Neu5Ac to terminal lactose in the LPS, LPS sialylation has been shown to be important for resistance to the killing effectors of normal human serum
Kpim_21850	51.111	1.01504	['VF0475']	Tap type IV pili		Aeromonas hydrophila	Adherence	Polar; similar to the P. aeruginosa Pil system; constitutively expressed		The role of the Tap pilus remains to be elucidated, its biogenesis has strong implications in virulence in other ways. TapD, a prepilin peptidase is not only required for the processing of the prepilins before they are incorporated into the pilus filament but also for the processing of the pseudopilins of the T2SS, that are essential for the secretion of many virulence factors
Kpim_21930	77.206	0.971429	['VF0478']	Exe T2SS		Aeromonas hydrophila	Effector delivery system			Essential for secretion of many virulence factors, such as aerolysin, proteases, haemolysin and DNase
Kpim_21940	58.867	1.00495	['VF0478']	Exe T2SS		Aeromonas hydrophila	Effector delivery system			Essential for secretion of many virulence factors, such as aerolysin, proteases, haemolysin and DNase
Kpim_21950	63.711	0.975855	['VF0478']	Exe T2SS		Aeromonas hydrophila	Effector delivery system			Essential for secretion of many virulence factors, such as aerolysin, proteases, haemolysin and DNase
Kpim_21960	60.731	0.957382	['VF0478']	Exe T2SS		Aeromonas hydrophila	Effector delivery system			Essential for secretion of many virulence factors, such as aerolysin, proteases, haemolysin and DNase
Kpim_22290	65.089	0.991202	['VF0044']	LOS		Haemophilus influenzae	Immune modulation	Lic1A (phosphorylcholine (ChoP) kinase) 5'-CAAT-3' within the 5'-end of its coding sequence; lic2A, also referred to as lexA, variation in the number of 5'-CAAT-3' repeats has been shown to correlate directly with phase variation of the Gal-<alpha>(1-4)<beta>-Gal LPS structure; But lgtC (glycosyltransferase), another phase-variable gene, ultimately dictates whether this structure is synthesized. …	Comprising Lipid A, an inner core of one molecule 3-deoxy-D-manno-oct-2-ulopyranosonic acid (Kdo) and three molecules of heptose, and an outer core composed of a heteropolymer of the neutral sugars glucose and galactose. Substitution of the out core with phosphorylcholine or sialic acid results in the heterogeneity of LPS; Lack O-antigen	Major immunogen; LOS phosphorylcholine (ChoP) may influence invasion via interaction with PAF receptor and stimulates of inflammatory signals; LPS phase variation is characterized by the spontaneous loss and gain of oligosaccharide structures present in the outer core. the phase variable expression of LPS biosynthesis genes promotes evasion of antigen-specific host immune defences and allow colon…	Lic1(lic1A-lic1D) responsible for the addition of phosphorylcholine to LPS. lic1A mediates phase variation (tetranucleotide repeat region); phase-variable gene lic3A encodes an <alpha>-2,3-sialyltransferase that is responsible for the addition of Neu5Ac to terminal lactose in the LPS, LPS sialylation has been shown to be important for resistance to the killing effectors of normal human serum
Kpim_22310	67.557	1	['VF0044']	LOS		Haemophilus influenzae	Immune modulation	Lic1A (phosphorylcholine (ChoP) kinase) 5'-CAAT-3' within the 5'-end of its coding sequence; lic2A, also referred to as lexA, variation in the number of 5'-CAAT-3' repeats has been shown to correlate directly with phase variation of the Gal-<alpha>(1-4)<beta>-Gal LPS structure; But lgtC (glycosyltransferase), another phase-variable gene, ultimately dictates whether this structure is synthesized. …	Comprising Lipid A, an inner core of one molecule 3-deoxy-D-manno-oct-2-ulopyranosonic acid (Kdo) and three molecules of heptose, and an outer core composed of a heteropolymer of the neutral sugars glucose and galactose. Substitution of the out core with phosphorylcholine or sialic acid results in the heterogeneity of LPS; Lack O-antigen	Major immunogen; LOS phosphorylcholine (ChoP) may influence invasion via interaction with PAF receptor and stimulates of inflammatory signals; LPS phase variation is characterized by the spontaneous loss and gain of oligosaccharide structures present in the outer core. the phase variable expression of LPS biosynthesis genes promotes evasion of antigen-specific host immune defences and allow colon…	Lic1(lic1A-lic1D) responsible for the addition of phosphorylcholine to LPS. lic1A mediates phase variation (tetranucleotide repeat region); phase-variable gene lic3A encodes an <alpha>-2,3-sialyltransferase that is responsible for the addition of Neu5Ac to terminal lactose in the LPS, LPS sialylation has been shown to be important for resistance to the killing effectors of normal human serum
Kpim_22320	63.926	0.984334	['VF0044']	LOS		Haemophilus influenzae	Immune modulation	Lic1A (phosphorylcholine (ChoP) kinase) 5'-CAAT-3' within the 5'-end of its coding sequence; lic2A, also referred to as lexA, variation in the number of 5'-CAAT-3' repeats has been shown to correlate directly with phase variation of the Gal-<alpha>(1-4)<beta>-Gal LPS structure; But lgtC (glycosyltransferase), another phase-variable gene, ultimately dictates whether this structure is synthesized. …	Comprising Lipid A, an inner core of one molecule 3-deoxy-D-manno-oct-2-ulopyranosonic acid (Kdo) and three molecules of heptose, and an outer core composed of a heteropolymer of the neutral sugars glucose and galactose. Substitution of the out core with phosphorylcholine or sialic acid results in the heterogeneity of LPS; Lack O-antigen	Major immunogen; LOS phosphorylcholine (ChoP) may influence invasion via interaction with PAF receptor and stimulates of inflammatory signals; LPS phase variation is characterized by the spontaneous loss and gain of oligosaccharide structures present in the outer core. the phase variable expression of LPS biosynthesis genes promotes evasion of antigen-specific host immune defences and allow colon…	Lic1(lic1A-lic1D) responsible for the addition of phosphorylcholine to LPS. lic1A mediates phase variation (tetranucleotide repeat region); phase-variable gene lic3A encodes an <alpha>-2,3-sialyltransferase that is responsible for the addition of Neu5Ac to terminal lactose in the LPS, LPS sialylation has been shown to be important for resistance to the killing effectors of normal human serum
Kpim_22480	69.004	1	['VF0513']	IlpA	Immunogenic lipoprotein A	Vibrio vulnificus	Adherence			Dual functions as an adhesin and an immunostimulant	A lipoprotein that stimulates production of proinflammatory cytokines via TLR2 in human monocytes; involved in bacterial adherence to host cells
Kpim_22720	79.167	0.994819	['VF0044']	LOS		Haemophilus influenzae	Immune modulation	Lic1A (phosphorylcholine (ChoP) kinase) 5'-CAAT-3' within the 5'-end of its coding sequence; lic2A, also referred to as lexA, variation in the number of 5'-CAAT-3' repeats has been shown to correlate directly with phase variation of the Gal-<alpha>(1-4)<beta>-Gal LPS structure; But lgtC (glycosyltransferase), another phase-variable gene, ultimately dictates whether this structure is synthesized. …	Comprising Lipid A, an inner core of one molecule 3-deoxy-D-manno-oct-2-ulopyranosonic acid (Kdo) and three molecules of heptose, and an outer core composed of a heteropolymer of the neutral sugars glucose and galactose. Substitution of the out core with phosphorylcholine or sialic acid results in the heterogeneity of LPS; Lack O-antigen	Major immunogen; LOS phosphorylcholine (ChoP) may influence invasion via interaction with PAF receptor and stimulates of inflammatory signals; LPS phase variation is characterized by the spontaneous loss and gain of oligosaccharide structures present in the outer core. the phase variable expression of LPS biosynthesis genes promotes evasion of antigen-specific host immune defences and allow colon…	Lic1(lic1A-lic1D) responsible for the addition of phosphorylcholine to LPS. lic1A mediates phase variation (tetranucleotide repeat region); phase-variable gene lic3A encodes an <alpha>-2,3-sialyltransferase that is responsible for the addition of Neu5Ac to terminal lactose in the LPS, LPS sialylation has been shown to be important for resistance to the killing effectors of normal human serum
Kpim_23360	90.556	1	['VF0404']	ECP	E. coli common pilus	Escherichia coli (EHEC)	Adherence			ECP, composed of a 21-kDa pilin subunit EspA, is a pilus-adherence factor that is crucial to the virulence of E. coli O157 in humans, and is also carried by commensal strains of E. coli.; It is suggested that pathogenic E. coli strains may use ECP to mimic commensal E. coli and provide themselves with an ecological advantage for host colonization and evasion of the immune system.
Kpim_23370	95.897	1	['VF0404']	ECP	E. coli common pilus	Escherichia coli (EHEC)	Adherence			ECP, composed of a 21-kDa pilin subunit EspA, is a pilus-adherence factor that is crucial to the virulence of E. coli O157 in humans, and is also carried by commensal strains of E. coli.; It is suggested that pathogenic E. coli strains may use ECP to mimic commensal E. coli and provide themselves with an ecological advantage for host colonization and evasion of the immune system.
Kpim_23380	90.09	1	['VF0404']	ECP	E. coli common pilus	Escherichia coli (EHEC)	Adherence			ECP, composed of a 21-kDa pilin subunit EspA, is a pilus-adherence factor that is crucial to the virulence of E. coli O157 in humans, and is also carried by commensal strains of E. coli.; It is suggested that pathogenic E. coli strains may use ECP to mimic commensal E. coli and provide themselves with an ecological advantage for host colonization and evasion of the immune system.
Kpim_23390	93.579	1	['VF0404']	ECP	E. coli common pilus	Escherichia coli (EHEC)	Adherence			ECP, composed of a 21-kDa pilin subunit EspA, is a pilus-adherence factor that is crucial to the virulence of E. coli O157 in humans, and is also carried by commensal strains of E. coli.; It is suggested that pathogenic E. coli strains may use ECP to mimic commensal E. coli and provide themselves with an ecological advantage for host colonization and evasion of the immune system.
Kpim_23400	94.333	1	['VF0404']	ECP	E. coli common pilus	Escherichia coli (EHEC)	Adherence			ECP, composed of a 21-kDa pilin subunit EspA, is a pilus-adherence factor that is crucial to the virulence of E. coli O157 in humans, and is also carried by commensal strains of E. coli.; It is suggested that pathogenic E. coli strains may use ECP to mimic commensal E. coli and provide themselves with an ecological advantage for host colonization and evasion of the immune system.
Kpim_23410	86.864	1	['VF0404']	ECP	E. coli common pilus	Escherichia coli (EHEC)	Adherence			ECP, composed of a 21-kDa pilin subunit EspA, is a pilus-adherence factor that is crucial to the virulence of E. coli O157 in humans, and is also carried by commensal strains of E. coli.; It is suggested that pathogenic E. coli strains may use ECP to mimic commensal E. coli and provide themselves with an ecological advantage for host colonization and evasion of the immune system.
Kpim_24460	66.495	0.937198	['VF0074']	ClpP		Listeria monocytogenes	Stress survival	21.6 kDa protein belongs to a family of proteases highly conserved in prokaryotes and eukaryotes		Serine protease involved in proteolysis and is required for growth under stress conditions
Kpim_24930	100	1	['VF0568']	AcrAB		Klebsiella pneumoniae	Antimicrobial activity/Competitive advantage			May mediate resistance against host-derived antimicrobial peptides; associated with antibiotic resistance
Kpim_24940	99.748	1	['VF0568']	AcrAB		Klebsiella pneumoniae	Antimicrobial activity/Competitive advantage			May mediate resistance against host-derived antimicrobial peptides; associated with antibiotic resistance
Kpim_25480	50.654	1	['VF0044']	LOS		Haemophilus influenzae	Immune modulation	Lic1A (phosphorylcholine (ChoP) kinase) 5'-CAAT-3' within the 5'-end of its coding sequence; lic2A, also referred to as lexA, variation in the number of 5'-CAAT-3' repeats has been shown to correlate directly with phase variation of the Gal-<alpha>(1-4)<beta>-Gal LPS structure; But lgtC (glycosyltransferase), another phase-variable gene, ultimately dictates whether this structure is synthesized. …	Comprising Lipid A, an inner core of one molecule 3-deoxy-D-manno-oct-2-ulopyranosonic acid (Kdo) and three molecules of heptose, and an outer core composed of a heteropolymer of the neutral sugars glucose and galactose. Substitution of the out core with phosphorylcholine or sialic acid results in the heterogeneity of LPS; Lack O-antigen	Major immunogen; LOS phosphorylcholine (ChoP) may influence invasion via interaction with PAF receptor and stimulates of inflammatory signals; LPS phase variation is characterized by the spontaneous loss and gain of oligosaccharide structures present in the outer core. the phase variable expression of LPS biosynthesis genes promotes evasion of antigen-specific host immune defences and allow colon…	Lic1(lic1A-lic1D) responsible for the addition of phosphorylcholine to LPS. lic1A mediates phase variation (tetranucleotide repeat region); phase-variable gene lic3A encodes an <alpha>-2,3-sialyltransferase that is responsible for the addition of Neu5Ac to terminal lactose in the LPS, LPS sialylation has been shown to be important for resistance to the killing effectors of normal human serum
Kpim_26050	50.51	1.02083	['VF0404']	ECP	E. coli common pilus	Escherichia coli (EHEC)	Adherence			ECP, composed of a 21-kDa pilin subunit EspA, is a pilus-adherence factor that is crucial to the virulence of E. coli O157 in humans, and is also carried by commensal strains of E. coli.; It is suggested that pathogenic E. coli strains may use ECP to mimic commensal E. coli and provide themselves with an ecological advantage for host colonization and evasion of the immune system.
Kpim_26670	83.981	0.995169	['VF0562']	Ent	Enterobactin	Klebsiella pneumoniae	Nutritional/Metabolic factor	Various iron acquisition systems in Klebsiella are needed to overcome host defenses in different anatomical compartments.	Prototypic catecholate siderophore; the highest known affinity for iron of any molecule; To counter the effects of Ent, neutrophils and epithelial cells secrete lipocalin 2 (Lcn2 also known as NGAL, Scn, and 24p3), which binds Ent with subnanomolar affinity	May be necessary for penetration to deeper tissues
Kpim_26680	99.326	1	['VF0562']	Ent	Enterobactin	Klebsiella pneumoniae	Nutritional/Metabolic factor	Various iron acquisition systems in Klebsiella are needed to overcome host defenses in different anatomical compartments.	Prototypic catecholate siderophore; the highest known affinity for iron of any molecule; To counter the effects of Ent, neutrophils and epithelial cells secrete lipocalin 2 (Lcn2 also known as NGAL, Scn, and 24p3), which binds Ent with subnanomolar affinity	May be necessary for penetration to deeper tissues
Kpim_26690	99.005	1	['VF0562']	Ent	Enterobactin	Klebsiella pneumoniae	Nutritional/Metabolic factor	Various iron acquisition systems in Klebsiella are needed to overcome host defenses in different anatomical compartments.	Prototypic catecholate siderophore; the highest known affinity for iron of any molecule; To counter the effects of Ent, neutrophils and epithelial cells secrete lipocalin 2 (Lcn2 also known as NGAL, Scn, and 24p3), which binds Ent with subnanomolar affinity	May be necessary for penetration to deeper tissues
Kpim_26710	99.613	1	['VF0562']	Ent	Enterobactin	Klebsiella pneumoniae	Nutritional/Metabolic factor	Various iron acquisition systems in Klebsiella are needed to overcome host defenses in different anatomical compartments.	Prototypic catecholate siderophore; the highest known affinity for iron of any molecule; To counter the effects of Ent, neutrophils and epithelial cells secrete lipocalin 2 (Lcn2 also known as NGAL, Scn, and 24p3), which binds Ent with subnanomolar affinity	May be necessary for penetration to deeper tissues
Kpim_26720	99.621	1	['VF0562']	Ent	Enterobactin	Klebsiella pneumoniae	Nutritional/Metabolic factor	Various iron acquisition systems in Klebsiella are needed to overcome host defenses in different anatomical compartments.	Prototypic catecholate siderophore; the highest known affinity for iron of any molecule; To counter the effects of Ent, neutrophils and epithelial cells secrete lipocalin 2 (Lcn2 also known as NGAL, Scn, and 24p3), which binds Ent with subnanomolar affinity	May be necessary for penetration to deeper tissues
Kpim_26730	100	1	['VF0562']	Ent	Enterobactin	Klebsiella pneumoniae	Nutritional/Metabolic factor	Various iron acquisition systems in Klebsiella are needed to overcome host defenses in different anatomical compartments.	Prototypic catecholate siderophore; the highest known affinity for iron of any molecule; To counter the effects of Ent, neutrophils and epithelial cells secrete lipocalin 2 (Lcn2 also known as NGAL, Scn, and 24p3), which binds Ent with subnanomolar affinity	May be necessary for penetration to deeper tissues
Kpim_26740	99.701	1	['VF0562']	Ent	Enterobactin	Klebsiella pneumoniae	Nutritional/Metabolic factor	Various iron acquisition systems in Klebsiella are needed to overcome host defenses in different anatomical compartments.	Prototypic catecholate siderophore; the highest known affinity for iron of any molecule; To counter the effects of Ent, neutrophils and epithelial cells secrete lipocalin 2 (Lcn2 also known as NGAL, Scn, and 24p3), which binds Ent with subnanomolar affinity	May be necessary for penetration to deeper tissues
Kpim_26750	98.789	1.01225	['VF0562']	Ent	Enterobactin	Klebsiella pneumoniae	Nutritional/Metabolic factor	Various iron acquisition systems in Klebsiella are needed to overcome host defenses in different anatomical compartments.	Prototypic catecholate siderophore; the highest known affinity for iron of any molecule; To counter the effects of Ent, neutrophils and epithelial cells secrete lipocalin 2 (Lcn2 also known as NGAL, Scn, and 24p3), which binds Ent with subnanomolar affinity	May be necessary for penetration to deeper tissues
Kpim_26760	99.373	1	['VF0562']	Ent	Enterobactin	Klebsiella pneumoniae	Nutritional/Metabolic factor	Various iron acquisition systems in Klebsiella are needed to overcome host defenses in different anatomical compartments.	Prototypic catecholate siderophore; the highest known affinity for iron of any molecule; To counter the effects of Ent, neutrophils and epithelial cells secrete lipocalin 2 (Lcn2 also known as NGAL, Scn, and 24p3), which binds Ent with subnanomolar affinity	May be necessary for penetration to deeper tissues
Kpim_26770	98.721	1	['VF0562']	Ent	Enterobactin	Klebsiella pneumoniae	Nutritional/Metabolic factor	Various iron acquisition systems in Klebsiella are needed to overcome host defenses in different anatomical compartments.	Prototypic catecholate siderophore; the highest known affinity for iron of any molecule; To counter the effects of Ent, neutrophils and epithelial cells secrete lipocalin 2 (Lcn2 also known as NGAL, Scn, and 24p3), which binds Ent with subnanomolar affinity	May be necessary for penetration to deeper tissues
Kpim_26780	99.626	1	['VF0562']	Ent	Enterobactin	Klebsiella pneumoniae	Nutritional/Metabolic factor	Various iron acquisition systems in Klebsiella are needed to overcome host defenses in different anatomical compartments.	Prototypic catecholate siderophore; the highest known affinity for iron of any molecule; To counter the effects of Ent, neutrophils and epithelial cells secrete lipocalin 2 (Lcn2 also known as NGAL, Scn, and 24p3), which binds Ent with subnanomolar affinity	May be necessary for penetration to deeper tissues
Kpim_26790	99.293	1	['VF0562']	Ent	Enterobactin	Klebsiella pneumoniae	Nutritional/Metabolic factor	Various iron acquisition systems in Klebsiella are needed to overcome host defenses in different anatomical compartments.	Prototypic catecholate siderophore; the highest known affinity for iron of any molecule; To counter the effects of Ent, neutrophils and epithelial cells secrete lipocalin 2 (Lcn2 also known as NGAL, Scn, and 24p3), which binds Ent with subnanomolar affinity	May be necessary for penetration to deeper tissues
Kpim_26800	98.79	0.988048	['VF0562']	Ent	Enterobactin	Klebsiella pneumoniae	Nutritional/Metabolic factor	Various iron acquisition systems in Klebsiella are needed to overcome host defenses in different anatomical compartments.	Prototypic catecholate siderophore; the highest known affinity for iron of any molecule; To counter the effects of Ent, neutrophils and epithelial cells secrete lipocalin 2 (Lcn2 also known as NGAL, Scn, and 24p3), which binds Ent with subnanomolar affinity	May be necessary for penetration to deeper tissues
Kpim_27770	96	1	['VF0113']	Fur	Ferric uptake regulator	Salmonella enterica (serovar typhimurium)	Regulation			Repress the expression of iron-regulated genes; also required for acid-induced activation of atr genes
Kpim_28390	58.58	1	['VF0044']	LOS		Haemophilus influenzae	Immune modulation	Lic1A (phosphorylcholine (ChoP) kinase) 5'-CAAT-3' within the 5'-end of its coding sequence; lic2A, also referred to as lexA, variation in the number of 5'-CAAT-3' repeats has been shown to correlate directly with phase variation of the Gal-<alpha>(1-4)<beta>-Gal LPS structure; But lgtC (glycosyltransferase), another phase-variable gene, ultimately dictates whether this structure is synthesized. …	Comprising Lipid A, an inner core of one molecule 3-deoxy-D-manno-oct-2-ulopyranosonic acid (Kdo) and three molecules of heptose, and an outer core composed of a heteropolymer of the neutral sugars glucose and galactose. Substitution of the out core with phosphorylcholine or sialic acid results in the heterogeneity of LPS; Lack O-antigen	Major immunogen; LOS phosphorylcholine (ChoP) may influence invasion via interaction with PAF receptor and stimulates of inflammatory signals; LPS phase variation is characterized by the spontaneous loss and gain of oligosaccharide structures present in the outer core. the phase variable expression of LPS biosynthesis genes promotes evasion of antigen-specific host immune defences and allow colon…	Lic1(lic1A-lic1D) responsible for the addition of phosphorylcholine to LPS. lic1A mediates phase variation (tetranucleotide repeat region); phase-variable gene lic3A encodes an <alpha>-2,3-sialyltransferase that is responsible for the addition of Neu5Ac to terminal lactose in the LPS, LPS sialylation has been shown to be important for resistance to the killing effectors of normal human serum
Kpim_28680	50.654	0.884393	['VF0552']	Biotin synthesis		Francisella tularensis	Nutritional/Metabolic factor	Biotin is an important enzyme cofactor that acts as a covalently bound prosthetic group; Biotin plays critical roles in central metabolic processes involving carboxylation, decarboxylation and transcarboxylation; F. novicida has evolved two distinct biotin protein ligases BplA and BirA with specific roles. Only BplA is required for pathogenicity		Critical for rapid phagosomal escape. Sequestration of biotin could restrict Francisella to the phagosome, blocking their escape and preventing them from reaching their replicative niche in the cytoplasm
Kpim_30630	66.436	0.993127	['VF0044']	LOS		Haemophilus influenzae	Immune modulation	Lic1A (phosphorylcholine (ChoP) kinase) 5'-CAAT-3' within the 5'-end of its coding sequence; lic2A, also referred to as lexA, variation in the number of 5'-CAAT-3' repeats has been shown to correlate directly with phase variation of the Gal-<alpha>(1-4)<beta>-Gal LPS structure; But lgtC (glycosyltransferase), another phase-variable gene, ultimately dictates whether this structure is synthesized. …	Comprising Lipid A, an inner core of one molecule 3-deoxy-D-manno-oct-2-ulopyranosonic acid (Kdo) and three molecules of heptose, and an outer core composed of a heteropolymer of the neutral sugars glucose and galactose. Substitution of the out core with phosphorylcholine or sialic acid results in the heterogeneity of LPS; Lack O-antigen	Major immunogen; LOS phosphorylcholine (ChoP) may influence invasion via interaction with PAF receptor and stimulates of inflammatory signals; LPS phase variation is characterized by the spontaneous loss and gain of oligosaccharide structures present in the outer core. the phase variable expression of LPS biosynthesis genes promotes evasion of antigen-specific host immune defences and allow colon…	Lic1(lic1A-lic1D) responsible for the addition of phosphorylcholine to LPS. lic1A mediates phase variation (tetranucleotide repeat region); phase-variable gene lic3A encodes an <alpha>-2,3-sialyltransferase that is responsible for the addition of Neu5Ac to terminal lactose in the LPS, LPS sialylation has been shown to be important for resistance to the killing effectors of normal human serum
Kpim_30640	51.768	0.953988	['VF0044']	LOS		Haemophilus influenzae	Immune modulation	Lic1A (phosphorylcholine (ChoP) kinase) 5'-CAAT-3' within the 5'-end of its coding sequence; lic2A, also referred to as lexA, variation in the number of 5'-CAAT-3' repeats has been shown to correlate directly with phase variation of the Gal-<alpha>(1-4)<beta>-Gal LPS structure; But lgtC (glycosyltransferase), another phase-variable gene, ultimately dictates whether this structure is synthesized. …	Comprising Lipid A, an inner core of one molecule 3-deoxy-D-manno-oct-2-ulopyranosonic acid (Kdo) and three molecules of heptose, and an outer core composed of a heteropolymer of the neutral sugars glucose and galactose. Substitution of the out core with phosphorylcholine or sialic acid results in the heterogeneity of LPS; Lack O-antigen	Major immunogen; LOS phosphorylcholine (ChoP) may influence invasion via interaction with PAF receptor and stimulates of inflammatory signals; LPS phase variation is characterized by the spontaneous loss and gain of oligosaccharide structures present in the outer core. the phase variable expression of LPS biosynthesis genes promotes evasion of antigen-specific host immune defences and allow colon…	Lic1(lic1A-lic1D) responsible for the addition of phosphorylcholine to LPS. lic1A mediates phase variation (tetranucleotide repeat region); phase-variable gene lic3A encodes an <alpha>-2,3-sialyltransferase that is responsible for the addition of Neu5Ac to terminal lactose in the LPS, LPS sialylation has been shown to be important for resistance to the killing effectors of normal human serum
Kpim_30670	72.112	1.0121	['VF0473']	Polar flagella		Aeromonas hydrophila	Motility	Types of bacterial movement: swimming, swarming, gliding, twitching and sliding. Only swimming and swarming are correlated with the presence of flagella. Swimming is an individual endeavour, while swarming is the movement of a group of bacteria; constitutively expressed for motility in liquid environments		Necessary for motility, adhesion and invasion; glycosylation of the flagellin may play a role in provoking a proinflammatory response
Kpim_31130	85.393	1	['VF0236']	OmpA	Outer membrane protein A	Escherichia coli (NMEC)	Invasion	Major outer membrane protein in E. coli, homologous to Neisseria Opa proteins which have been shown to be involved in invasion of eukaryotic cells	N-terminal domain crosses the membrane eight time in antiparallel <beta>-strands with four relatively large and hydrophilic surface-exposed loops; The N-terminal surface-exposed loops of OmpA are contribute to E. coli K1 invasion of BMECs	Contributes to brain microvascular endothelial cells (BMECs) invasion via a ligand-receptor interaction. Interaction of OmpA with its receptor induces actin condensation at the binding site. The actin reorganization induced by E. coli depends on activation of several host proteins involved in signaling, including focal adhesion kinase, PI3-kinase, PKC-<alpha>, and caveolin-1; OmpA also binds to C…	Binds to a 95-kDa HBMEC receptor, Ecgp, for E. coli invasion. OmpA-Ecgp interaction occurs via GlcNAc1,4-GlcNAc epitopes as well as the protein backbone of the receptor. The presence of Ecgp on human brain microvascular endothelial cell, but not on non-brain endothelial cells. Ecgp is a gp96 (a cell surface glycoprotein related to heat shock proteins) homologue.
Kpim_31890	53.094	1.00327	['VF0044']	LOS		Haemophilus influenzae	Immune modulation	Lic1A (phosphorylcholine (ChoP) kinase) 5'-CAAT-3' within the 5'-end of its coding sequence; lic2A, also referred to as lexA, variation in the number of 5'-CAAT-3' repeats has been shown to correlate directly with phase variation of the Gal-<alpha>(1-4)<beta>-Gal LPS structure; But lgtC (glycosyltransferase), another phase-variable gene, ultimately dictates whether this structure is synthesized. …	Comprising Lipid A, an inner core of one molecule 3-deoxy-D-manno-oct-2-ulopyranosonic acid (Kdo) and three molecules of heptose, and an outer core composed of a heteropolymer of the neutral sugars glucose and galactose. Substitution of the out core with phosphorylcholine or sialic acid results in the heterogeneity of LPS; Lack O-antigen	Major immunogen; LOS phosphorylcholine (ChoP) may influence invasion via interaction with PAF receptor and stimulates of inflammatory signals; LPS phase variation is characterized by the spontaneous loss and gain of oligosaccharide structures present in the outer core. the phase variable expression of LPS biosynthesis genes promotes evasion of antigen-specific host immune defences and allow colon…	Lic1(lic1A-lic1D) responsible for the addition of phosphorylcholine to LPS. lic1A mediates phase variation (tetranucleotide repeat region); phase-variable gene lic3A encodes an <alpha>-2,3-sialyltransferase that is responsible for the addition of Neu5Ac to terminal lactose in the LPS, LPS sialylation has been shown to be important for resistance to the killing effectors of normal human serum
Kpim_32140	77.869	1	['VF0473']	Polar flagella		Aeromonas hydrophila	Motility	Types of bacterial movement: swimming, swarming, gliding, twitching and sliding. Only swimming and swarming are correlated with the presence of flagella. Swimming is an individual endeavour, while swarming is the movement of a group of bacteria; constitutively expressed for motility in liquid environments		Necessary for motility, adhesion and invasion; glycosylation of the flagellin may play a role in provoking a proinflammatory response
Kpim_32150	61.538	1	['VF0367']	LPS	Lipopolysaccharide	Brucella melitensis	Immune modulation	Brucella possesses a non-classical LPS as compared with the so-called classical LPS from enterobacteria such as Escherichia coli. B. abortus lipid A possesses a diaminoglucose backbone (rather than glucosamine), and acyl groups are longer (C28 rather than C12 and C16) and are only linked to the core by amide bounds (rather than ester and amide bonds).; In contrast to enterobacterial LPSs, Brucell…		Plays a role in entry and early survival inside macrophages; Resistance to innate-immunity anti-bacterial responses; a modulator of the immune response	The entry and early survival stages of smooth Brucella are lipid-raft-dependent. The entry-gateway seems to include Brucella surface-exposed HSP60-PrPc (cellular prion protein) interaction but also a SR-A (class A scavenger)-lipid-A interaction and is also dependent on the LPS O-chain. And the LPS O-chain ensures the Brucella containing vacuole (BCV) aviodance of fusion with lysosomes transiently…
Kpim_32310	99.863	1	['VF0565']	Aerobactin		Klebsiella pneumoniae	Nutritional/Metabolic factor	Aer is typically plasmid-encoded; the siderophore Aer has been distinguished as the most common siderophore secreted by hypervirulent K. pneumoniae		Citrate-hydroxamate siderophore aerobactin is needed for successful infection by hypervirulent K. pneumoniae in pneumonic infections
Kpim_32500	80.698	0.997951	['VF0111']	PhoPQ		Salmonella enterica (serovar typhimurium)	Regulation			Activated by low divalent cations magnesium and calcium levels; control expression of more than 40 genes; required for intracellular survival, cationic antimicrobial peptides (CAMPs) resistance, stimulation of cytokine secretion	PhoQ contains distinct binding sites for Mg2+ and Ca2+, and is maximally repressed in the presence of both cations. PhoP-PO4 activates expression of pags (for PhoP-activated genes), including cation transporter, outer membrane proteins, nonspecific acid phosphatase, enzymes important for LPS modification, and pmrAB (a second two-component system that are activated in response to mildly acidic env…
Kpim_32510	93.274	1	['VF0111']	PhoPQ		Salmonella enterica (serovar typhimurium)	Regulation			Activated by low divalent cations magnesium and calcium levels; control expression of more than 40 genes; required for intracellular survival, cationic antimicrobial peptides (CAMPs) resistance, stimulation of cytokine secretion	PhoQ contains distinct binding sites for Mg2+ and Ca2+, and is maximally repressed in the presence of both cations. PhoP-PO4 activates expression of pags (for PhoP-activated genes), including cation transporter, outer membrane proteins, nonspecific acid phosphatase, enzymes important for LPS modification, and pmrAB (a second two-component system that are activated in response to mildly acidic env…
Kpim_34030	66.347	1.0055	['VF0563']	Sal	Salmochelin	Klebsiella pneumoniae	Nutritional/Metabolic factor	Salmochelin is a glycosylated Ent that requires the iroA locus for production and transport		A major trigger of inflammation and bacterial dissemination induced during K. pneuminiae lung infection	Inducing dissemination through chelation of host cellular iron, leading to inactivation of iron-dependent prolyl hydroxylases and the master transcription factor hypoxia inducible factor-1<alpha> (HIF-1<alpha>) stabilization in lung epithelial cells. HIF-1<alpha> controls vascular permeability and inflammatory gene expression
Kpim_34550	50	0.857143	['VF0072']	ClpC		Listeria monocytogenes	Stress survival	27-kDa stress protein belongs to the Hsp100/Clp family; Regulation of Clp protease expression is mediated by CtsR, the product of the first gene in the ClpC operon		An ATPase promoting early escape form the phagosome of macrophages; ClpC is also required for adhesion and invasion, possibly by modulating the expression of InlA,InlB and ActA
Kpim_35460	99.387	1	['VF0569']	T6SS		Klebsiella pneumoniae	Effector delivery system	Type VI bacterial lipase/phospholipase effectors (Tle) has been sub-divided into Tle1Tle5. The Tle1Tle4 families exhibit the GXSXG motif, while Tle5 present a dual HXKXXXXD motif		Antibacterial activity	The type VI membrane-targeting phospholipase effector Tle1 and Tli1 immunity proteins play a role in intraspecies antagonism
Kpim_35470	99.611	1	['VF0569']	T6SS		Klebsiella pneumoniae	Effector delivery system	Type VI bacterial lipase/phospholipase effectors (Tle) has been sub-divided into Tle1Tle5. The Tle1Tle4 families exhibit the GXSXG motif, while Tle5 present a dual HXKXXXXD motif		Antibacterial activity	The type VI membrane-targeting phospholipase effector Tle1 and Tli1 immunity proteins play a role in intraspecies antagonism
Kpim_35480	99.329	1	['VF0569']	T6SS		Klebsiella pneumoniae	Effector delivery system	Type VI bacterial lipase/phospholipase effectors (Tle) has been sub-divided into Tle1Tle5. The Tle1Tle4 families exhibit the GXSXG motif, while Tle5 present a dual HXKXXXXD motif		Antibacterial activity	The type VI membrane-targeting phospholipase effector Tle1 and Tli1 immunity proteins play a role in intraspecies antagonism
Kpim_35490	99.563	1	['VF0569']	T6SS		Klebsiella pneumoniae	Effector delivery system	Type VI bacterial lipase/phospholipase effectors (Tle) has been sub-divided into Tle1Tle5. The Tle1Tle4 families exhibit the GXSXG motif, while Tle5 present a dual HXKXXXXD motif		Antibacterial activity	The type VI membrane-targeting phospholipase effector Tle1 and Tli1 immunity proteins play a role in intraspecies antagonism
Kpim_35500	97.887	1	['VF0569']	T6SS		Klebsiella pneumoniae	Effector delivery system	Type VI bacterial lipase/phospholipase effectors (Tle) has been sub-divided into Tle1Tle5. The Tle1Tle4 families exhibit the GXSXG motif, while Tle5 present a dual HXKXXXXD motif		Antibacterial activity	The type VI membrane-targeting phospholipase effector Tle1 and Tli1 immunity proteins play a role in intraspecies antagonism
Kpim_35510	100	1	['VF0569']	T6SS		Klebsiella pneumoniae	Effector delivery system	Type VI bacterial lipase/phospholipase effectors (Tle) has been sub-divided into Tle1Tle5. The Tle1Tle4 families exhibit the GXSXG motif, while Tle5 present a dual HXKXXXXD motif		Antibacterial activity	The type VI membrane-targeting phospholipase effector Tle1 and Tli1 immunity proteins play a role in intraspecies antagonism
Kpim_35520	99.095	1	['VF0569']	T6SS		Klebsiella pneumoniae	Effector delivery system	Type VI bacterial lipase/phospholipase effectors (Tle) has been sub-divided into Tle1Tle5. The Tle1Tle4 families exhibit the GXSXG motif, while Tle5 present a dual HXKXXXXD motif		Antibacterial activity	The type VI membrane-targeting phospholipase effector Tle1 and Tli1 immunity proteins play a role in intraspecies antagonism
Kpim_35530	80.934	0.973485	['VF0569']	T6SS		Klebsiella pneumoniae	Effector delivery system	Type VI bacterial lipase/phospholipase effectors (Tle) has been sub-divided into Tle1Tle5. The Tle1Tle4 families exhibit the GXSXG motif, while Tle5 present a dual HXKXXXXD motif		Antibacterial activity	The type VI membrane-targeting phospholipase effector Tle1 and Tli1 immunity proteins play a role in intraspecies antagonism
Kpim_35630	95.873	0.913234	['VF0569']	T6SS		Klebsiella pneumoniae	Effector delivery system	Type VI bacterial lipase/phospholipase effectors (Tle) has been sub-divided into Tle1Tle5. The Tle1Tle4 families exhibit the GXSXG motif, while Tle5 present a dual HXKXXXXD motif		Antibacterial activity	The type VI membrane-targeting phospholipase effector Tle1 and Tli1 immunity proteins play a role in intraspecies antagonism
Kpim_35640	75.556	1	['VF0569']	T6SS		Klebsiella pneumoniae	Effector delivery system	Type VI bacterial lipase/phospholipase effectors (Tle) has been sub-divided into Tle1Tle5. The Tle1Tle4 families exhibit the GXSXG motif, while Tle5 present a dual HXKXXXXD motif		Antibacterial activity	The type VI membrane-targeting phospholipase effector Tle1 and Tli1 immunity proteins play a role in intraspecies antagonism
Kpim_35650	57.713	0.997347	['VF0569']	T6SS		Klebsiella pneumoniae	Effector delivery system	Type VI bacterial lipase/phospholipase effectors (Tle) has been sub-divided into Tle1Tle5. The Tle1Tle4 families exhibit the GXSXG motif, while Tle5 present a dual HXKXXXXD motif		Antibacterial activity	The type VI membrane-targeting phospholipase effector Tle1 and Tli1 immunity proteins play a role in intraspecies antagonism
Kpim_35660	99.658	1	['VF0569']	T6SS		Klebsiella pneumoniae	Effector delivery system	Type VI bacterial lipase/phospholipase effectors (Tle) has been sub-divided into Tle1Tle5. The Tle1Tle4 families exhibit the GXSXG motif, while Tle5 present a dual HXKXXXXD motif		Antibacterial activity	The type VI membrane-targeting phospholipase effector Tle1 and Tli1 immunity proteins play a role in intraspecies antagonism
Kpim_35670	99.723	1	['VF0569']	T6SS		Klebsiella pneumoniae	Effector delivery system	Type VI bacterial lipase/phospholipase effectors (Tle) has been sub-divided into Tle1Tle5. The Tle1Tle4 families exhibit the GXSXG motif, while Tle5 present a dual HXKXXXXD motif		Antibacterial activity	The type VI membrane-targeting phospholipase effector Tle1 and Tli1 immunity proteins play a role in intraspecies antagonism
Kpim_35680	100	1	['VF0569']	T6SS		Klebsiella pneumoniae	Effector delivery system	Type VI bacterial lipase/phospholipase effectors (Tle) has been sub-divided into Tle1Tle5. The Tle1Tle4 families exhibit the GXSXG motif, while Tle5 present a dual HXKXXXXD motif		Antibacterial activity	The type VI membrane-targeting phospholipase effector Tle1 and Tli1 immunity proteins play a role in intraspecies antagonism
Kpim_38040	50.92	1.01875	['VF0569']	T6SS		Klebsiella pneumoniae	Effector delivery system	Type VI bacterial lipase/phospholipase effectors (Tle) has been sub-divided into Tle1Tle5. The Tle1Tle4 families exhibit the GXSXG motif, while Tle5 present a dual HXKXXXXD motif		Antibacterial activity	The type VI membrane-targeting phospholipase effector Tle1 and Tli1 immunity proteins play a role in intraspecies antagonism
Kpim_38420	99.353	1	['VF0563']	Sal	Salmochelin	Klebsiella pneumoniae	Nutritional/Metabolic factor	Salmochelin is a glycosylated Ent that requires the iroA locus for production and transport		A major trigger of inflammation and bacterial dissemination induced during K. pneuminiae lung infection	Inducing dissemination through chelation of host cellular iron, leading to inactivation of iron-dependent prolyl hydroxylases and the master transcription factor hypoxia inducible factor-1<alpha> (HIF-1<alpha>) stabilization in lung epithelial cells. HIF-1<alpha> controls vascular permeability and inflammatory gene expression
Kpim_39470	54.233	0.95	['VF0094']	Pyoverdine		Pseudomonas aeruginosa	Nutritional/Metabolic factor	A greenish-yellow compound, a hydroxyquinolone chromophore to which an amino acid tail is attached, the tail can vary in length; the synthesis of pyoverdine requires a special <sigma> factor, PvdS, which is in turn regulated by the Fur repressor; also called pseudobactin		Effective at acquiring iron from transferrin and lactoferrin; cytotoxic due to its ability to stimulating the production of reactive oxygen species	Pvd is a fluorescent dihydroxyquinoline derivative connected to a small peptide and contains hydroxamate and catecholate residues to chelate ferric ion, Fe (III). Pvd chelates Fe (III) in a 1:1 stoichiometry with high affinity (stability constant, 10**32); FpvA is the specific receptor for Fe(III)-pyoverdin
Kpim_39650	57.992	0.975172	['VF0168']	KatAB		Legionella pneumophila	Stress survival			A periplasmic catalase, expressed maximally during the post-exponential phase; important for intracellular survival and transmission
Kpim_39670	70.404	0.986726	['VF0106']	MgtBC		Salmonella enterica (serovar typhimurium)	Nutritional/Metabolic factor	Hypothesized to be a magnesium transporter		MgtA and MgtB are not required for intracellular survival or for virulence, MgtC is essential for both functions
Kpim_40310	57.055	0.951362	['VF0302']	Nitrate reductase		Mycobacterium tuberculosis	Nutritional/Metabolic factor	NarX function as a respiratory fused nitrate reductase (three different domains present in this protein encode the difference subunits of nitrate reductase: the N-terminal domain showing similarity to narG, the central domain showing homology with narJ and the C-terminus showing homology to narI); NarGHJI is a membrane-bound nitrate reductase complex; NarK2, a putative nitrite-extrusion protein		Nitrate respiration helps the bacteria to survive in O2-depleted areas of inflammatory or necrotic tissue
Kpim_41320	52.273	1.01734	['VF0109']	SodCI		Salmonella enterica (serovar typhimurium)	Stress survival	Encoded on the lysogenic phage Gifsy-2		Contribute to survival during systemic phase of infection
Kpim_41420	66.492	0.989637	['VF0169']	SodB		Legionella pneumophila	Stress survival			A cytoplasmic iron superoxide dismutase; important for intracellular survival and transmission
Kpim_43450	74.394	0.963333	['VF0044']	LOS		Haemophilus influenzae	Immune modulation	Lic1A (phosphorylcholine (ChoP) kinase) 5'-CAAT-3' within the 5'-end of its coding sequence; lic2A, also referred to as lexA, variation in the number of 5'-CAAT-3' repeats has been shown to correlate directly with phase variation of the Gal-<alpha>(1-4)<beta>-Gal LPS structure; But lgtC (glycosyltransferase), another phase-variable gene, ultimately dictates whether this structure is synthesized. …	Comprising Lipid A, an inner core of one molecule 3-deoxy-D-manno-oct-2-ulopyranosonic acid (Kdo) and three molecules of heptose, and an outer core composed of a heteropolymer of the neutral sugars glucose and galactose. Substitution of the out core with phosphorylcholine or sialic acid results in the heterogeneity of LPS; Lack O-antigen	Major immunogen; LOS phosphorylcholine (ChoP) may influence invasion via interaction with PAF receptor and stimulates of inflammatory signals; LPS phase variation is characterized by the spontaneous loss and gain of oligosaccharide structures present in the outer core. the phase variable expression of LPS biosynthesis genes promotes evasion of antigen-specific host immune defences and allow colon…	Lic1(lic1A-lic1D) responsible for the addition of phosphorylcholine to LPS. lic1A mediates phase variation (tetranucleotide repeat region); phase-variable gene lic3A encodes an <alpha>-2,3-sialyltransferase that is responsible for the addition of Neu5Ac to terminal lactose in the LPS, LPS sialylation has been shown to be important for resistance to the killing effectors of normal human serum
Kpim_43600	54.175	0.960861	['VF0302']	Nitrate reductase		Mycobacterium tuberculosis	Nutritional/Metabolic factor	NarX function as a respiratory fused nitrate reductase (three different domains present in this protein encode the difference subunits of nitrate reductase: the N-terminal domain showing similarity to narG, the central domain showing homology with narJ and the C-terminus showing homology to narI); NarGHJI is a membrane-bound nitrate reductase complex; NarK2, a putative nitrite-extrusion protein		Nitrate respiration helps the bacteria to survive in O2-depleted areas of inflammatory or necrotic tissue
Kpim_43770	83.039	0.996479	['VF0044']	LOS		Haemophilus influenzae	Immune modulation	Lic1A (phosphorylcholine (ChoP) kinase) 5'-CAAT-3' within the 5'-end of its coding sequence; lic2A, also referred to as lexA, variation in the number of 5'-CAAT-3' repeats has been shown to correlate directly with phase variation of the Gal-<alpha>(1-4)<beta>-Gal LPS structure; But lgtC (glycosyltransferase), another phase-variable gene, ultimately dictates whether this structure is synthesized. …	Comprising Lipid A, an inner core of one molecule 3-deoxy-D-manno-oct-2-ulopyranosonic acid (Kdo) and three molecules of heptose, and an outer core composed of a heteropolymer of the neutral sugars glucose and galactose. Substitution of the out core with phosphorylcholine or sialic acid results in the heterogeneity of LPS; Lack O-antigen	Major immunogen; LOS phosphorylcholine (ChoP) may influence invasion via interaction with PAF receptor and stimulates of inflammatory signals; LPS phase variation is characterized by the spontaneous loss and gain of oligosaccharide structures present in the outer core. the phase variable expression of LPS biosynthesis genes promotes evasion of antigen-specific host immune defences and allow colon…	Lic1(lic1A-lic1D) responsible for the addition of phosphorylcholine to LPS. lic1A mediates phase variation (tetranucleotide repeat region); phase-variable gene lic3A encodes an <alpha>-2,3-sialyltransferase that is responsible for the addition of Neu5Ac to terminal lactose in the LPS, LPS sialylation has been shown to be important for resistance to the killing effectors of normal human serum
Kpim_43970	58.603	1	['VF0569']	T6SS		Klebsiella pneumoniae	Effector delivery system	Type VI bacterial lipase/phospholipase effectors (Tle) has been sub-divided into Tle1Tle5. The Tle1Tle4 families exhibit the GXSXG motif, while Tle5 present a dual HXKXXXXD motif		Antibacterial activity	The type VI membrane-targeting phospholipase effector Tle1 and Tli1 immunity proteins play a role in intraspecies antagonism
Kpim_44090	55.257	1.00224	['VF0569']	T6SS		Klebsiella pneumoniae	Effector delivery system	Type VI bacterial lipase/phospholipase effectors (Tle) has been sub-divided into Tle1Tle5. The Tle1Tle4 families exhibit the GXSXG motif, while Tle5 present a dual HXKXXXXD motif		Antibacterial activity	The type VI membrane-targeting phospholipase effector Tle1 and Tli1 immunity proteins play a role in intraspecies antagonism
Kpim_45200	60.082	0.987805	['VF0696']	T4SS secreted effectors		Coxiella burnetii	Effector delivery system			CBUA0020; CBU_0012*; CBU_0113; CBU_0122; CBU_0183; CBU_0201; CBU_0270; CBU_0295; CBU_0344*; CBU_0372; CBU_0375*; CBU_0469; CBU_0513; CBU_0534; CBU_0590; CBU_0635; CBU_0637; CBU_0820*; CBU_1048*; CBU_1079; CBU_1107*; CBU_1150*; CBU_1198; CBU_1268; CBU_1349; CBU_1370; CBU_1409; CBU_1434; CBU_1493; CBU_1495*; CBU_1525*; CBU_1530; CBU_1566; CBU_1576; CBU_1594; CBU_1607; CBU_1614; CBU_1639; CBU_1665; …
Kpim_45550	50	1	['VF0262']	LetA/S		Legionella pneumophila	Regulation			Activates gene expression indirectly by counteracting the repressor of translation known as CsrA or RsmA	Predicted to induce the expression of a crsB regulatory RNA that alleviates CsrA binding to mRNAs
Kpim_45640	100	1	['VF0571']	RcsAB	Regulation of capsule synthesis	Klebsiella pneumoniae	Regulation			RcsB combined with the unstable auxiliary regulator RcsA to bind to an RcsAB box in the promoter region to upregulate the cps genes expression
Kpim_46440	99.742	1	['VF0560']	Capsule		Klebsiella pneumoniae	Immune modulation	The Klebsiella polysaccharide capsule is produced through a Wzy-dependent process, for which the synthesis and export machinery are encoded in a single 10-30 kb region of the genome known as the K locus.; 78 distinct capsule phenotypes have been recognized by serological typing, but many isolates are serologically non-typable.; capsular serotypes vary substantially in the degree of serum resistan…		Assisting in evading the host immune system by protecting bacteria from opsonophagocytosis and serum killing
Kpim_46450	99.359	1	['VF0560']	Capsule		Klebsiella pneumoniae	Immune modulation	The Klebsiella polysaccharide capsule is produced through a Wzy-dependent process, for which the synthesis and export machinery are encoded in a single 10-30 kb region of the genome known as the K locus.; 78 distinct capsule phenotypes have been recognized by serological typing, but many isolates are serologically non-typable.; capsular serotypes vary substantially in the degree of serum resistan…		Assisting in evading the host immune system by protecting bacteria from opsonophagocytosis and serum killing
Kpim_46540	60.674	0.962162	['VF0171']	LPS		Legionella pneumophila	Immune modulation		O-side chain is made up of homopolymer repeats of a single sugar residue designated legionaminic acid, and the core region is highly O-acetylated providing hydrophobic characteristic on the LPS structure	Phase variation associated with changes in virulence
Kpim_46550	66.096	1.01038	['VF0542']	LPS		Francisella tularensis	Immune modulation	The structure of Francisella spp. lipid A is unique in that it is modified by various carbohydrates that greatly reduce TLR4 activation and allow for immune evasion		A key virulence factor does not signal through, and is not an agonist of, toll like receptor 4 (TLR-4) and has little endotoxic activity	Francisella lipid A is a very poor stimulant of the host's innate immunity. The lack of immune recognition of Franciscella lipid A has been attributed to several structural differences compared to E. coli lipid A. These include (1) the absence of phosphate at the 40 position as well as the modification of 1-phosphate with GalN and (2) tetraacylation of lipid A with longer acyl chains (1618 carbo…
Kpim_46560	64.264	0.940678	['VF0044']	LOS		Haemophilus influenzae	Immune modulation	Lic1A (phosphorylcholine (ChoP) kinase) 5'-CAAT-3' within the 5'-end of its coding sequence; lic2A, also referred to as lexA, variation in the number of 5'-CAAT-3' repeats has been shown to correlate directly with phase variation of the Gal-<alpha>(1-4)<beta>-Gal LPS structure; But lgtC (glycosyltransferase), another phase-variable gene, ultimately dictates whether this structure is synthesized. …	Comprising Lipid A, an inner core of one molecule 3-deoxy-D-manno-oct-2-ulopyranosonic acid (Kdo) and three molecules of heptose, and an outer core composed of a heteropolymer of the neutral sugars glucose and galactose. Substitution of the out core with phosphorylcholine or sialic acid results in the heterogeneity of LPS; Lack O-antigen	Major immunogen; LOS phosphorylcholine (ChoP) may influence invasion via interaction with PAF receptor and stimulates of inflammatory signals; LPS phase variation is characterized by the spontaneous loss and gain of oligosaccharide structures present in the outer core. the phase variable expression of LPS biosynthesis genes promotes evasion of antigen-specific host immune defences and allow colon…	Lic1(lic1A-lic1D) responsible for the addition of phosphorylcholine to LPS. lic1A mediates phase variation (tetranucleotide repeat region); phase-variable gene lic3A encodes an <alpha>-2,3-sialyltransferase that is responsible for the addition of Neu5Ac to terminal lactose in the LPS, LPS sialylation has been shown to be important for resistance to the killing effectors of normal human serum
Kpim_46600	53.026	0.963889	['VF0560']	Capsule		Klebsiella pneumoniae	Immune modulation	The Klebsiella polysaccharide capsule is produced through a Wzy-dependent process, for which the synthesis and export machinery are encoded in a single 10-30 kb region of the genome known as the K locus.; 78 distinct capsule phenotypes have been recognized by serological typing, but many isolates are serologically non-typable.; capsular serotypes vary substantially in the degree of serum resistan…		Assisting in evading the host immune system by protecting bacteria from opsonophagocytosis and serum killing
Kpim_46610	90.716	0.994723	['VF0560']	Capsule		Klebsiella pneumoniae	Immune modulation	The Klebsiella polysaccharide capsule is produced through a Wzy-dependent process, for which the synthesis and export machinery are encoded in a single 10-30 kb region of the genome known as the K locus.; 78 distinct capsule phenotypes have been recognized by serological typing, but many isolates are serologically non-typable.; capsular serotypes vary substantially in the degree of serum resistan…		Assisting in evading the host immune system by protecting bacteria from opsonophagocytosis and serum killing
Kpim_46620	94.781	1	['VF0560']	Capsule		Klebsiella pneumoniae	Immune modulation	The Klebsiella polysaccharide capsule is produced through a Wzy-dependent process, for which the synthesis and export machinery are encoded in a single 10-30 kb region of the genome known as the K locus.; 78 distinct capsule phenotypes have been recognized by serological typing, but many isolates are serologically non-typable.; capsular serotypes vary substantially in the degree of serum resistan…		Assisting in evading the host immune system by protecting bacteria from opsonophagocytosis and serum killing
Kpim_46640	91.388	1	['VF0560']	Capsule		Klebsiella pneumoniae	Immune modulation	The Klebsiella polysaccharide capsule is produced through a Wzy-dependent process, for which the synthesis and export machinery are encoded in a single 10-30 kb region of the genome known as the K locus.; 78 distinct capsule phenotypes have been recognized by serological typing, but many isolates are serologically non-typable.; capsular serotypes vary substantially in the degree of serum resistan…		Assisting in evading the host immune system by protecting bacteria from opsonophagocytosis and serum killing
Kpim_46650	100	0.993289	['VF0560']	Capsule		Klebsiella pneumoniae	Immune modulation	The Klebsiella polysaccharide capsule is produced through a Wzy-dependent process, for which the synthesis and export machinery are encoded in a single 10-30 kb region of the genome known as the K locus.; 78 distinct capsule phenotypes have been recognized by serological typing, but many isolates are serologically non-typable.; capsular serotypes vary substantially in the degree of serum resistan…		Assisting in evading the host immune system by protecting bacteria from opsonophagocytosis and serum killing
Kpim_47930	100	1	['VF0571']	RcsAB	Regulation of capsule synthesis	Klebsiella pneumoniae	Regulation			RcsB combined with the unstable auxiliary regulator RcsA to bind to an RcsAB box in the promoter region to upregulate the cps genes expression
Kpim_49570	65.226	0.981678	['VF0568']	AcrAB		Klebsiella pneumoniae	Antimicrobial activity/Competitive advantage			May mediate resistance against host-derived antimicrobial peptides; associated with antibiotic resistance
Kpim_50540	64.921	1	['VF0091']	Alginate	Mucoid exopolysaccharide	Pseudomonas aeruginosa	Biofilm	Alginate production is frequently referred to as mucoidy because colonies producing alginate have a wet glistening (mucoid) appearance, which is very different from that of colonies not producing alginate; most of the alginate biosynthetic genes are clustered in the algD operon; Alginate production is highly regulated. Regulatory genes are located in two areas far removed from the biosynthetic ge…	Alginate is a linear polymer of high molecular weight composed of the uronic acids <beta>-D-mannuronate and its C-5 epimer, <alpha>-L-guluronate, which are linked by <beta>-1,4 glycosidic bonds; The early steps in the biosynthesis of alginate to form GDP mannuronic acid require the products of algA and algC to convert fructose-6-phosphate to GDP-mannose and then require the product of algD to con…	Allows the bacteria form biofilm; contributes to the persistence of the bacteria in the CF lung: act as an adhesin, preventing the bacteria from being expelled from the lung, and alginate slime layer makes it more difficult for phagocytes to ingest and kill the bacteria
Kpim_50910	71.895	0.995662	['VF0237']	Ibes	Invasion of brain endothelial cells	Escherichia coli (NMEC)	Invasion	IbeA is unique to E. coli K1. The ibeB and ibeC are found to have K12 homologues p77211 and yijP respectively.	IbeA and IbeB encode outer membrane proteins with three and two transmembrane domains, respectively; IbeC has a signal peptide-like sequence and five or six transmembrane segments at its N terminus	Contributes to brain microvascular endothelial cells (BMECs) invasion via a ligand-receptor interaction	Unknown; the roles of Ibe proteins in E. coli K1 invasion of BMECs were verified by deletion and complementation experiments
Kpim_51330	50	0.857143	['VF0072']	ClpC		Listeria monocytogenes	Stress survival	27-kDa stress protein belongs to the Hsp100/Clp family; Regulation of Clp protease expression is mediated by CtsR, the product of the first gene in the ClpC operon		An ATPase promoting early escape form the phagosome of macrophages; ClpC is also required for adhesion and invasion, possibly by modulating the expression of InlA,InlB and ActA
