# Supplementary material for: Modulation of Klebsiella pneumoniae Outer Membrane Vesicle Protein Cargo under Antibiotic Treatment
Source: Biomedicines. 2023 May 24;11(6):1515. doi: 10.3390/biomedicines11061515 (PMC10294825; doi:10.3390/biomedicines11061515)
Supplement: Supplementary file 1 [file biomedicines-11-01515-s001.zip › Table S2. Ribosomal proteins identified in KpHCD1-OMVs after treatments with different anti-biotics.xlsx]

## Sheet: Planilha1
Protein IDs	Protein Name	Treatment	Total Intensity	log2 Intensity
				KP1	KP2	KP3	MERO1	MERO2	MERO3	AMI1	AMI2	AMI3	POL1	POL2	POL3	MAP1	MAP2	MAP3
Kpim_08600	30S ribosomal protein S3	All	9710600000	20.3309	NaN	20.7134	26.0907	25.5898	25.5258	22.078	23.4297	23.5729	25.3536	24.9551	23.9849	23.5956	NaN	23.4454
Kpim_08730	30S ribosomal protein S7	All	585200000	21.777	NaN	21.8884	20.8196	20.9466	NaN	NaN	22.0064	21.5171	21.0608	21.2984	20.6837	20.4678	21.482	21.5307
Kpim_15220	50S ribosomal protein L1	All	2891800000	21.4863	21.2526	21.804	23.5997	24.0174	23.8648	23.3038	23.9305	23.9	23.3731	22.5761	21.446	23.7407	22.1782	23.7514
Kpim_15230	50S ribosomal protein L10	All	2413200000	22.5436	22.8428	23.2167	23.4948	23.7045	23.0612	21.5606	23.4288	23.7603	23.3182	21.9529	21.4368	22.9721	22.6398	22.7769
Kpim_08510	50S ribosomal protein L6	All	1408100000	21.1888	21.401	21.6953	21.8342	21.7888	21.8777	NaN	22.7683	22.6367	22.7565	22.8648	NaN	23.3843	NaN	23.162
Kpim_08670	30S ribosomal protein S10	MERO, AMI, POL, MAP	3355500000	NaN	22.4803	NaN	22.5517	22.5617	23.0639	NaN	23.9358	23.8155	24.38	24.476	23.1102	24.2985	23.7803	24.5249
Kpim_22190	30S ribosomal protein S2	MERO, AMI, POL, MAP	4641200000	NaN	NaN	22.1684	24.8303	24.7326	23.8976	NaN	24.3024	24.2582	25.058	24.4739	21.6513	24.2799	NaN	23.3886
Kpim_08430	30S ribosomal protein S4	MERO, AMI, POL, MAP	5510600000	NaN	NaN	20.5287	24.4891	23.5266	23.4924	NaN	22.1604	22.5044	24.5888	24.689	23.4584	22.4538	21.3062	22.5247
Kpim_08490	30S ribosomal protein S5	MERO, AMI, POL, MAP	1511000000	NaN	NaN	NaN	22.5968	22.4774	22.1863	NaN	22.5625	22.3692	23.6523	23.1706	NaN	21.4274	NaN	22.4285
Kpim_15210	50S ribosomal protein L11	MERO, AMI, POL, MAP	761050000	NaN	NaN	22.6645	21.4837	21.248	21.7273	NaN	23.1411	22.5953	23.1336	21.9938	NaN	21.8369	NaN	22.9311
Kpim_07630	50S ribosomal protein L13	MERO, AMI, POL, MAP	580540000	NaN	NaN	NaN	21.3556	21.401	NaN	21.3007	22.3663	23.076	20.315	21.5278	NaN	22.3569	NaN	22.551
Kpim_08630	50S ribosomal protein L2	MERO, AMI, POL, MAP	5308400000	NaN	19.6885	NaN	24.525	23.3906	23.1078	NaN	20.5991	20.7275	24.0102	24.1039	22.858	21.28	NaN	21.7038
Kpim_43190	50S ribosomal protein L20	MERO, AMI, POL, MAP	423430000	NaN	NaN	NaN	22.7587	21.6623	21.2147	NaN	21.921	21.4888	21.7764	21.5198	NaN	21.1653	NaN	21.1957
Kpim_08540	50S ribosomal protein L5	MERO, AMI, POL, MAP	6219700000	NaN	NaN	NaN	24.1675	24.1901	24.8649	NaN	23.1659	23.2001	25.0041	24.6026	24.5302	24.7353	NaN	23.1506
Kpim_17670	50S ribosomal protein L9	MERO, AMI, POL, MAP	1454900000	NaN	NaN	NaN	20.005	20.3434	NaN	21.4207	21.5485	22.1731	23.0512	23.1665	NaN	23.5585	22.0244	23.2964
Kpim_08440	30S ribosomal protein S13	MERO, POL, MAP	570240000	NaN	NaN	NaN	22.3251	21.1873	21.7573	NaN	NaN	21.5702	20.8618	21.6002	NaN	21.2762	NaN	21.7629
Kpim_08520	30S ribosomal protein S8	MERO, POL, MAP	1717000000	NaN	NaN	NaN	21.9153	22.34	23.0921	NaN	NaN	23.2006	23.2454	22.5455	25.0336	22.6105	NaN	23.3529
Kpim_07620	30S ribosomal protein S9	MERO, POL, MAP	237480000	NaN	NaN	NaN	21.633	20.4639	NaN	NaN	NaN	20.8525	21.753	21.5771	NaN	19.733	NaN	20.8771
Kpim_08610	50S ribosomal protein L22	MERO, POL, MAP	500390000	NaN	NaN	NaN	21.0579	21.0952	21.4283	NaN	NaN	21.6821	22.7344	22.3105	NaN	20.4721	NaN	21.3771
Kpim_08470	50S ribosomal protein L15	MERO, AMI, POL	886310000	NaN	NaN	NaN	22.3546	21.656	NaN	NaN	21.8188	22.0029	22.4482	23.1535	22.8342	NaN	NaN	21.3919
Kpim_08410	50S ribosomal protein L17	MERO, AMI, POL	337880000	NaN	NaN	22.3147	22.5736	21.6147	NaN	NaN	22.2982	21.997	21.577	21.8077	NaN	20.8044	NaN	NaN
Kpim_11320	50S ribosomal protein L33	AMI, MAP	283390000	NaN	24.01	NaN	NaN	NaN	NaN	23.5539	24.4221	22.9579	NaN	NaN	NaN	21.7425	23.8193	22.6366
Kpim_15240	50S ribosomal protein L7/L12	MERO, MAP	2063000000	NaN	NaN	NaN	23.5148	NaN	22.9609	NaN	NaN	25.8816	NaN	NaN	NaN	24.8364	26.3067	25.7169
Kpim_08590	50S ribosomal protein L16	MERO, POL	385080000	NaN	NaN	NaN	20.7205	20.412	NaN	NaN	NaN	NaN	21.7175	22.1332	NaN	NaN	NaN	NaN
Kpim_08650	50S ribosomal protein L4	MERO, POL	1326500000	NaN	NaN	NaN	22.9883	22.3255	NaN	NaN	NaN	NaN	23.886	23.6323	22.7275	21.6092	NaN	NaN
Kpim_08500	50S ribosomal protein L18	MAP	110590000	23.4579	NaN	NaN	NaN	NaN	NaN	NaN	NaN	NaN	NaN	NaN	NaN	20.9526	22.7289	NaN
Kpim_17660	30S ribosomal protein S18	MERO	358890000	NaN	NaN	NaN	21.7675	21.5463	NaN	NaN	NaN	22.1237	NaN	21.9563	NaN	21.0346	NaN	NaN
Kpim_00190	50S ribosomal protein L19	MERO	287750000	NaN	NaN	NaN	21.8287	21.751	21.6643	NaN	NaN	NaN	NaN	21.6294	NaN	NaN	NaN	NaN
Kpim_08660	50S ribosomal protein L3	MERO	98053000	NaN	NaN	NaN	21.2673	20.7917	NaN	NaN	NaN	NaN	NaN	NaN	NaN	NaN	NaN	NaN
Kpim_30600	30S ribosomal protein S1	POL	3106600000	NaN	NaN	NaN	NaN	NaN	NaN	NaN	NaN	NaN	24.8172	24.7227	25.8615	NaN	NaN	NaN
Kpim_08740	30S ribosomal protein S12	POL	2131100000	NaN	NaN	NaN	24.4303	NaN	NaN	NaN	NaN	NaN	25.016	24.9536	NaN	NaN	NaN	NaN
Kpim_08620	30S ribosomal protein S19	POL	2791300000	NaN	NaN	NaN	NaN	NaN	NaN	NaN	NaN	NaN	25.2951	25.2128	26.136	NaN	NaN	NaN
Kpim_06010	30S ribosomal protein S21	POL	1004100000	NaN	NaN	NaN	NaN	NaN	NaN	NaN	NaN	NaN	24.0331	24.0975	25.1245	NaN	NaN	NaN
Kpim_08560	50S ribosomal protein L14	POL	1245900000	NaN	NaN	NaN	23.5861	NaN	NaN	NaN	NaN	NaN	25.0537	24.5203	NaN	NaN	NaN	NaN
Kpim_08580	50S ribosomal protein L29	POL	99176000	NaN	NaN	NaN	NaN	NaN	NaN	NaN	NaN	NaN	21.0983	20.6184	NaN	NaN	NaN	NaN
