# Supplementary material for: Modulation of Klebsiella pneumoniae Outer Membrane Vesicle Protein Cargo under Antibiotic Treatment
Source: Biomedicines. 2023 May 24;11(6):1515. doi: 10.3390/biomedicines11061515 (PMC10294825; doi:10.3390/biomedicines11061515)
Supplement: Supplementary file 1 [file biomedicines-11-01515-s001.zip › Table S3. Perturbed Proteins in KpHCD1-OMVs after Treatments with Different Antibiotics.xlsx]

## Sheet: Planilha1
		P-adj (in strong yellow, p-adj < 0.05, pale yellow if padj between 0.05 and 0.1)										Ratio (for padj < 0.1)										Centered Intensity
Protein ID	Protein Name	AMI_vs_KP	AMI_vs_MAP	AMI_vs_POL	MAP_vs_KP	MERO_vs_AMI	MERO_vs_KP	MERO_vs_MAP	MERO_vs_POL	POL_vs_KP	POL_vs_MAP	AMI_vs_KP	AMI_vs_MAP	AMI_vs_POL	MAP_vs_KP	MERO_vs_AMI	MERO_vs_KP	MERO_vs_MAP	MERO_vs_POL	POL_vs_KP	POL_vs_MAP	AMI	KP	MAP	MERO	POL
Kpim_14410	Thioredoxin 1	1	1	0.0265	1	1	0.117	1	0.0409	0.000467	0.00896	NS	NS	5.58	NS	NS	NS	NS	4.13	-7.85	-6.19	0.827	3.1	1.44	-0.617	-4.75
Kpim_15240	50S ribosomal protein L7/L12	1	1	0.148	0.58	1	1	0.7	0.27	1	0.00896	NS	NS	NS	NS	NS	NS	NS	NS	NS	-7.74	0.749	-1.53	4.18	0.159	-3.56
Kpim_08420	DNA directed RNA polymerase subunit alpha	1	1	0.0333	1	1	1	1	0.00876	0.0384	0.0334	NS	NS	-5.83	NS	NS	NS	NS	-6.7	5.52	6.27	-0.967	-0.653	-1.41	-1.84	4.86
Kpim_33850	Periplasmic chaperone Spy	1	1	0.0466	1	1	1	1	0.377	0.109	0.0334	NS	NS	4.04	NS	NS	NS	NS	NS	NS	-4.68	1.11	0.489	1.75	-0.416	-2.93
Kpim_20660	4 hydroxy tetrahydrodipicolinate reductase	1	1	0.0265	1	0.0454	0.0052	0.117	1	0.00362	0.0334	NS	NS	6.85	NS	-6.88	-7.87	NS	NS	-7.84	-6.27	2.67	3.66	2.08	-4.21	-4.19
Kpim_50290	Serine hydroxymethyltransferase 1	1	1	0.0546	1	1	1	1	0.882	0.133	0.0377	NS	NS	-6.18	NS	NS	NS	NS	NS	NS	7.24	-1.79	-0.935	-2.84	1.16	4.4
Kpim_15270	DNA directed RNA polymerase subunit beta'	1	1	0.0265	1	0.555	1	1	0.89	0.183	0.0377	NS	NS	-4.65	NS	NS	NS	NS	NS	NS	4.21	-1.92	-0.205	-1.48	0.878	2.73
Kpim_10490	Periplasmic dipeptide transport protein	1	1	0.0333	1	1	0.406	1	0.00566	0.292	0.0428	NS	NS	4.19	NS	NS	NS	NS	5.29	NS	-4.13	0.927	-0.557	0.87	2.02	-3.26
Kpim_28040	Succinate dehydrogenase iron sulfur subunit	1	1	0.0489	1	1	1	1	0.168	0.0221	0.0428	NS	NS	-4.47	NS	NS	NS	NS	NS	5.32	4.91	-0.855	-1.7	-1.29	0.234	3.62
Kpim_12880	ATP synthase subunit beta	1	1	0.0697	1	1	0.14	0.861	1	0.0193	0.0428	NS	NS	-3.44	NS	NS	NS	NS	NS	4.55	4.1	-0.737	-1.85	-1.4	1.29	2.7
Kpim_07880	Biotin carboxyl carrier protein of acetyl CoA carboxylase	1	1	0.087	1	1	1	1	0.0323	0.187	0.0567	NS	NS	-3.62	NS	NS	NS	NS	-4.24	NS	4.3	-0.541	-0.17	-1.21	-1.16	3.08
Kpim_30360	ATP dependent Clp protease ATP binding subunit ClpA	1	1	0.0648	1	1	1	1	0.0109	0.111	0.0592	NS	NS	-4.42	NS	NS	NS	NS	-5.96	NS	4.83	-0.567	-0.218	-0.97	-2.1	3.86
Kpim_07650	Inner membrane protein YhcB	1	1	0.0875	1	1	1	1	0.0158	0.0597	0.0592	NS	NS	-3.11	NS	NS	NS	NS	-4.16	3.42	3.6	-0.253	-0.558	-0.748	-1.3	2.86
Kpim_08790	FKBP type peptidyl prolyl cis trans isomerase FkpA	1	1	0.0489	1	1	1	1	0.0409	0.296	0.0592	NS	NS	3.12	NS	NS	NS	NS	3.09	NS	-3.16	0.805	-0.0934	0.839	0.767	-2.32
Kpim_41260	Outer membrane lipoprotein SlyB	1	1	0.379	1	1	1	1	0.0409	0.277	0.0592	NS	NS	NS	NS	NS	NS	NS	2.82	NS	-2.98	-0.0745	0.147	1.02	0.861	-1.96
Kpim_15440	DNA binding protein HU alpha	1	1	0.207	1	1	0.0346	0.64	1	0.00625	0.0827	NS	NS	NS	NS	NS	-6.99	NS	NS	-8.23	-5.84	0.548	4.26	1.87	-2.72	-3.96
Kpim_15260	DNA directed RNA polymerase subunit beta	1	1	0.0333	1	1	1	1	0.0409	0.0109	0.0952	NS	NS	-3.72	NS	NS	NS	NS	-3.14	4.14	3.05	-0.909	-1.33	-0.244	-0.331	2.81
Kpim_08620	30S ribosomal protein S19	1	1	0.0335	1	1	1	1	0.00566	0.0452	0.0959	NS	NS	-5.24	NS	NS	NS	NS	-7.12	4.86	4.53	-0.892	-0.511	-0.175	-2.77	4.35
Kpim_30600	30S ribosomal protein S1	1	1	0.0333	1	1	1	1	0.00977	0.0997	0.108	NS	NS	-5.76	NS	NS	NS	NS	-6.48	4.51	NS	-1.47	-0.222	-0.396	-2.19	4.28
Kpim_01790	Murein hydrolase activator NlpD	1	1	0.224	1	0.563	0.0213	1	0.00566	1	0.116	NS	NS	NS	NS	NS	3.6	NS	4.31	NS	NS	0.16	-1.25	0.704	2.35	-1.96
Kpim_27360	Endolytic peptidoglycan transglycosylase RlpA	1	1	0.451	1	0.434	0.0664	1	0.00566	1	0.128	NS	NS	NS	NS	NS	3.89	NS	5.53	NS	NS	-0.188	-0.974	0.863	2.92	-2.62
Kpim_29350	Glutathione binding protein GsiB	1	1	0.0365	1	1	1	1	0.0321	0.307	0.128	NS	NS	3.8	NS	NS	NS	NS	3.72	NS	NS	1.15	-0.125	0.561	1.07	-2.65
Kpim_06010	30S ribosomal protein S21	1	1	0.047	1	1	0.85	1	0.0197	0.849	0.137	NS	NS	-4.68	NS	NS	NS	NS	-5.09	NS	NS	-1.41	0.739	-0.792	-1.82	3.28
Kpim_49750	Uracil phosphoribosyltransferase	1	1	0.75	1	1	0.646	1	0.0186	0.99	0.146	NS	NS	NS	NS	NS	NS	NS	-4.31	NS	NS	0.239	0.349	-0.95	-1.97	2.33
Kpim_08630	50S ribosomal protein L2	1	1	0.0504	1	0.261	0.0488	0.64	1	0.0266	0.152	NS	NS	-2.78	NS	NS	3.07	NS	NS	3.24	NS	-1.06	-1.52	-0.696	1.55	1.73
Kpim_27180	Alkyl hydroperoxide reductase C	1	1	0.271	1	1	1	1	0.0441	1	0.159	NS	NS	NS	NS	NS	NS	NS	-5.73	NS	NS	-0.703	0.931	-1.55	-2.2	3.53
Kpim_06270	Autoinducer 2 binding protein LsrB	1	1	0.0489	1	1	1	1	0.89	1	0.165	NS	NS	3.49	NS	NS	NS	NS	NS	NS	NS	1.61	-0.683	1.06	-0.112	-1.88
Kpim_24400	Cytochrome bo(3) ubiquinol oxidase subunit 1	1	1	0.0875	1	1	1	1	0.0146	0.196	0.168	NS	NS	-4.38	NS	NS	NS	NS	-5.95	NS	NS	-0.703	-0.24	-0.471	-2.27	3.68
Kpim_32840	hypothetical protein	1	1	0.0333	1	1	1	1	0.0136	0.247	0.228	NS	NS	-4.21	NS	NS	NS	NS	-4.27	NS	NS	-1.46	0.143	0.0723	-1.52	2.76
Kpim_28170	Protein TolB	1	1	0.109	1	1	0.135	1	0.0146	1	0.228	NS	NS	NS	NS	NS	NS	NS	3.73	NS	NS	0.665	-0.877	0.421	1.76	-1.97
Kpim_32590	Isocitrate dehydrogenase [NADP]	1	1	0.0384	1	1	1	1	0.055	0.0452	0.228	NS	NS	-5.09	NS	NS	NS	NS	-4.46	4.96	NS	-1.44	-1.31	-0.08	-0.813	3.65
Kpim_24930	Multidrug efflux pump subunit AcrB	1	1	0.0333	1	0.725	0.389	1	1	0.0332	0.228	NS	NS	-3.97	NS	NS	NS	NS	NS	3.91	NS	-1.57	-1.5	-0.301	0.967	2.41
Kpim_08650	50S ribosomal protein L4	1	1	0.0353	1	1	1	1	1	0.777	0.228	NS	NS	-4.37	NS	NS	NS	NS	NS	NS	NS	-2.05	0.0354	-0.771	0.463	2.32
Kpim_33430	MltA interacting protein	1	1	0.171	0.583	1	0.0168	1	1	0.00113	0.245	NS	NS	NS	NS	NS	4.63	NS	NS	5.9	NS	-0.227	-3.4	-0.114	1.23	2.51
Kpim_06830	Penicillin binding protein activator LpoA	1	1	0.279	1	1	0.121	1	0.0433	1	0.282	NS	NS	NS	NS	NS	NS	NS	3.34	NS	NS	0.698	-1.4	0.789	1.63	-1.71
Kpim_32220	PTS system glucose specific EIICB component	1	1	0.137	1	1	1	1	0.0409	0.307	0.289	NS	NS	NS	NS	NS	NS	NS	-2.99	NS	NS	-0.51	-0.198	-0.228	-1.03	1.96
Kpim_04220	Small conductance mechanosensitive channel	1	1	0.224	1	1	1	1	0.0321	0.247	0.298	NS	NS	NS	NS	NS	NS	NS	-3.39	NS	NS	-0.28	-0.329	-0.198	-1.29	2.1
Kpim_28030	Succinate dehydrogenase flavoprotein subunit	1	1	0.168	1	1	1	1	0.0812	0.0459	0.299	NS	NS	NS	NS	NS	NS	NS	-3.12	3.64	NS	-0.411	-1.21	-0.123	-0.684	2.43
Kpim_13070	Ribose import binding protein RbsB	1	1	0.0996	1	0.856	0.125	1	1	0.043	0.301	NS	NS	2.46	NS	NS	NS	NS	NS	-2.99	NS	0.868	1.4	0.407	-1.08	-1.59
Kpim_31850	Glucans biosynthesis glucosyltransferase H	1	1	0.0335	1	1	1	1	0.0555	1	0.431	NS	NS	-3.67	NS	NS	NS	NS	-3.06	NS	NS	-1.59	0.613	-0.105	-0.988	2.07
Kpim_24650	putative lipoprotein YbaY	1	1	1	1	1	1	1	0.0433	0.919	0.46	NS	NS	NS	NS	NS	NS	NS	-4.88	NS	NS	0.329	-0.0886	-0.634	-2.24	2.64
Kpim_32150	Acyl carrier protein	1	1	1	1	1	0.125	1	1	0.043	0.604	NS	NS	NS	NS	NS	NS	NS	NS	-7.42	NS	-0.58	4.32	1.21	-1.84	-3.1
Kpim_40530	putative protein YncE	1	1	0.279	1	1	0.117	1	0.0197	1	0.664	NS	NS	NS	NS	NS	NS	NS	5.44	NS	NS	0.845	-1.48	0.323	2.88	-2.56
Kpim_17370	RNA binding protein Hfq	1	1	0.0333	0.607	0.434	0.0429	1	1	0.00474	0.689	NS	NS	3.44	NS	NS	-3.47	NS	NS	-4.4	NS	1.33	2.29	-0.341	-1.18	-2.11
Kpim_08430	30S ribosomal protein S4	1	1	0.224	1	1	0.127	1	1	0.043	0.689	NS	NS	NS	NS	NS	NS	NS	NS	3.33	NS	-0.706	-1.71	-0.202	1.01	1.61
Kpim_29210	putative L,D transpeptidase YbiS	1	1	1	1	1	0.135	1	0.0409	1	0.748	NS	NS	NS	NS	NS	NS	NS	3.38	NS	NS	-0.00919	-0.932	0.439	1.94	-1.44
Kpim_46600	Putative tyrosine protein kinase in cps region	1	1	0.0489	1	1	1	1	0.614	0.0597	0.748	NS	NS	-3.39	NS	NS	NS	NS	NS	3.25	NS	-1.31	-1.17	0.221	0.172	2.08
Kpim_43150	Integration host factor subunit alpha	1	1	0.327	1	0.554	0.0449	1	1	0.0452	0.823	NS	NS	NS	NS	NS	-5.18	NS	NS	-4.73	NS	1.16	2.74	0.514	-2.43	-1.99
Kpim_28590	Putative acyl CoA thioester hydrolase YbhC	1	1	0.279	1	1	0.0772	1	0.017	1	0.941	NS	NS	NS	NS	NS	2.74	NS	3.28	NS	NS	0.514	-0.91	0.0159	1.83	-1.45
Kpim_32340	putative L,D transpeptidase YcfS	1	1	0.802	1	1	0.07	1	0.0186	1	0.985	NS	NS	NS	NS	NS	3.06	NS	3.51	NS	NS	0.228	-0.989	0.137	2.07	-1.44
Kpim_34100	Exodeoxyribonuclease 8	1	1	0.102	1	1	1	0.117	0.00876	0.109	1	NS	NS	NS	NS	NS	NS	NS	-4.4	NS	NS	-0.62	-0.718	1.29	-2.17	2.22
Kpim_34390	hypothetical protein	1	1	0.0996	1	1	0.107	0.869	0.0186	1	1	NS	NS	-2.49	NS	NS	NS	NS	-3.26	NS	NS	-0.971	0.892	0.297	-1.74	1.52
Kpim_31960	putative lipoprotein YceB	1	1	0.448	1	1	0.0829	0.869	0.0228	1	1	NS	NS	NS	NS	NS	-3.92	NS	-4.49	NS	NS	-0.75	1.28	0.261	-2.64	1.85
Kpim_45040	Inner membrane protein YebE	1	1	1	1	0.35	1	0.117	0.0357	0.99	1	NS	NS	NS	NS	NS	NS	NS	4.42	NS	NS	-0.708	0.836	-1.7	2.99	-1.42
Kpim_22140	hypothetical protein	1	1	0.45	1	1	1	1	0.0409	0.043	1	NS	NS	NS	NS	NS	NS	NS	3.03	-3.19	NS	0.0634	1.33	-0.72	1.18	-1.85
Kpim_32780	hypothetical protein	1	1	1	1	1	0.0664	0.117	0.0409	1	1	NS	NS	NS	NS	NS	-3.01	NS	-2.92	NS	NS	-0.477	0.868	0.98	-2.14	0.773
Kpim_24470	ATP dependent Clp protease ATP binding subunit ClpX	1	1	0.0353	1	1	1	1	0.0426	0.469	1	NS	NS	-4.99	NS	NS	NS	NS	-4.5	NS	NS	-2.1	-0.0939	0.929	-1.62	2.89
Kpim_43400	Periplasmic oligopeptide binding protein	1	1	1	1	1	0.7	1	0.0441	1	1	NS	NS	NS	NS	NS	NS	NS	4.63	NS	NS	-0.0709	-0.405	0.239	2.43	-2.19
Kpim_43420	Aldehyde alcohol dehydrogenase	1	1	1	1	0.0454	0.117	0.117	0.0468	1	1	NS	NS	NS	NS	5.58	NS	NS	4.2	NS	NS	-1.88	-0.257	-1.07	3.7	-0.495
Kpim_01610	putative hemoglobin and hemoglobin haptoglobin binding protein 2	1	1	1	1	0.27	0.649	0.328	0.0468	1	1	NS	NS	NS	NS	NS	NS	NS	3.5	NS	NS	-0.842	0.256	-0.903	2.49	-1
Kpim_26680	Ferrienterobactin receptor	1	1	1	0.583	0.197	0.0052	1	0.133	0.232	1	NS	NS	NS	NS	NS	5.12	NS	NS	NS	NS	-0.675	-2.49	0.507	2.63	0.0239
Kpim_09770	Cell division ATP binding protein FtsE	1	1	0.458	1	1	1	1	0.175	0.0452	1	NS	NS	NS	NS	NS	NS	NS	NS	-4.35	NS	0.389	2.07	-1.1	0.918	-2.28
Kpim_22120	Periplasmic serine endoprotease DegP	1	1	0.405	0.607	0.261	0.0213	1	1	0.0597	1	NS	NS	NS	NS	NS	3.8	NS	NS	2.96	NS	-1.08	-2.08	0.562	1.72	0.883
Kpim_06490	putative protein YqjD	1	1	1	1	1	0.135	1	1	0.0332	1	NS	NS	NS	NS	NS	NS	NS	NS	4.85	NS	0.0416	-2.84	-0.0812	0.862	2.02
